# 1 **Gametophyte genome activation occurs at** 2 **pollen mitosis I in maize**

3  
4 Brad Nelms<sup>1,2,\*</sup> and Virginia Walbot<sup>1</sup>

5  
6 <sup>1</sup>Department of Biology, Stanford University, Stanford, CA 94305, USA

7 <sup>2</sup>Present address: Department of Plant Biology, University of Georgia, Athens, GA 30602,  
8 USA

9 \*email: nelms@uga.edu

10

11

## 12 **Abstract:**

13 **Flowering plants alternate between multicellular haploid (gametophyte) and**  
14 **diploid (sporophyte) generations. One consequence of this life cycle is that**  
15 **plants face substantial selection during the haploid phase<sup>1-3</sup>. Pollen actively**  
16 **transcribes its haploid genome<sup>4</sup>, providing phenotypic diversity even among**  
17 **pollen grains from a single plant. Currently, the timing that pollen precursors**  
18 **first establish this independence is unclear. Starting with an endowment of**  
19 **transcripts from the diploid parent, when do haploid cells generated by meiosis**  
20 **begin to express genes? Here, we follow the shift to haploid expression in maize**  
21 **pollen using allele-specific RNA-sequencing (RNA-Seq) of single pollen**  
22 **precursors. We observe widespread biallelic expression for 11 days after**  
23 **meiosis, indicating that transcripts synthesized by the diploid sporophyte**  
24 **persist long into the haploid phase. Subsequently, there was a rapid and global**  
25 **conversion to monoallelic expression at pollen mitosis I (PMI), driven by active**  
26 **new transcription from the haploid genome. Genes expressed during the haploid**  
27 **phase showed reduced rates of nonsynonymous relative to synonymous**  
28 **substitutions ( $d_n/d_s$ ) if they were expressed after PMI, but not before, consistent**  
29 **with purifying selection acting on the haploid gametophyte. This work**

**establishes the timing with which haploid selection may act in pollen and provides a detailed time-course of gene expression during pollen development.**

Plants do not make gametes directly after meiosis, instead forming a multi-cellular haploid organism called the gametophyte. While the size of the gametophyte is reduced in flowering plants (2-3 cells for male pollen and 4-15 cells for the female embryo sac), the haploid generation retains a high degree of independence. Gametophytes actively transcribe genes, with over 60% of the genome expressed post-meiotically in pollen<sup>4</sup>. Many genes are required during the haploid phase, as even modest chromosome deletions are not transmitted<sup>5,6</sup>. Furthermore, mutants that cannot progress through the haploid stage are routinely isolated in plant genetic screens, with hundreds of gametophytic mutants identified in *Arabidopsis* alone<sup>7</sup>. This widespread haploid expression exposes a large portion of the genome to natural selection in the gametophyte. Pollen, in particular, has a high capacity for selection because of the large population sizes (e.g.  $>10^6$  pollen grains per maize plant) and intense competition during dispersal and fertilization. It is thus not surprising that pollen selection has diverse consequences<sup>3</sup>: reducing inbreeding depression<sup>8</sup>, increasing offspring fitness<sup>9</sup>, and contributing to sex chromosome evolution<sup>10</sup> and sex-specific differences in recombination rates<sup>11</sup>. Pollen selection has further been employed in breeding programs to derive cold-tolerant crop varieties<sup>12,13</sup>.

The broad impacts of haploid selection in plants raises an important question: when does the haploid genome take over from its diploid parent? The haploid phase of pollen development is a complex and dynamic process<sup>14</sup> that in maize lasts 20 days<sup>15</sup> (Fig. 1a), roughly one third of the total time from seed to anthesis. There is no guarantee that gene products will be derived from the haploid genome immediately after meiosis. By comparison, the maternal genome controls most early events in animal (and likely plant) post-fertilization development, followed by a maternal-to-zygotic transition in which degradation of maternal products is coordinated with zygotic genome activation<sup>16</sup>. Does

an analogous parent-to-offspring transition occur in pollen? If plants provision some portion of pollen development with diploid products, it would constrain the amount of haploid selection they experience. Here, we obtain allele-specific RNA-sequencing data from single pollen precursors across 26 days of development – from the beginning of meiosis through pollen shed. These data allow us to follow, throughout time and on a gene-by-gene basis, when expression shifts from biallelic to monoallelic during pollen development.

65

### Allele-specific RNA-seq of single pollen precursors

To test our ability to separate the contributions of parent (sporophyte) and offspring (gametophyte) to the transcriptome of individual pollen precursors, we first isolated single diploid pollen mother cells (PMCs; cells poised to initiate meiosis) and haploid pollen grains from an F1 hybrid between the A188 and B73 inbred lines. These two stages are separated by 26 days and represent the extremes of fully diploid expression to maximally haploid-derived expression. We detected a mean of 364,003 transcripts per sample. On average, 32.4% of transcripts could be unambiguously attributed to either the A188 or B73 alleles – hereafter referred to as genoinformative transcripts. At least one genoinformative transcript was detected for 64.3% of expressed genes.

In single PMCs, most genes were expressed from both alleles (Fig. 1b), as expected for diploid genome expression. In mature pollen grains, in contrast, genes were expressed almost exclusively from one allele (Fig. 1c). While multiple biological mechanisms can produce monoallelic expression, two pieces of evidence confirm that pollen monoallelic expression reflects expression from the haploid genome. First, there was no bias towards either the A188 or B73 alleles (Fig. 1d), as would be predicted by parental imprinting or inbred-specific effects such as presence/absence variation. Second, extensive blocks of linked genes on chromosome arms were expressed from the same parental allele, with infrequent shifts to the alternate parental allele characteristic of

85 meiotic recombination (Fig. 1e and S1). Using the allele-specific expression data, we  
 86 infer an average of 1.36 crossovers per chromosome (Fig. S2a) with more frequent  
 87 crossovers towards the telomeres (Fig. S2b), in agreement with the established  
 88 crossover frequency<sup>17</sup> and distribution<sup>18</sup> in maize. Thus, we conclude that RNA-seq of  
 89 individual cells and pollen grains can distinguish expression originating from the diploid  
 90 and haploid genomes.

91

## 92 **Gene expression during pollen development**

93 We next profiled 349 single pollen precursors collected from 67 staged anthers, with  
 94 dense sampling between pre-meiotic interphase through mature pollen (Fig. 1f and  
 95 Table S1). To facilitate sample staging, precursors were collected from one anther for  
 96 RNA-seq while the remaining two anthers from the same floret were fixed for  
 97 microscopy. There was reproducible correspondence between gene expression and  
 98 microscopic stage (Fig. 1f). As we will be comparing bi- and tri-cellular stages of pollen  
 99 development with earlier unicellular stages, we collectively refer to these samples as  
 100 single pollen precursors rather than single cells.

101 Gene expression did not change uniformly during development, but rather showed  
 102 periods of rapid change interspersed with periods of relative stasis. There was a large  
 103 shift in gene expression during early meiotic prophase I (Fig. 1f, arrow), consistent with  
 104 an early prophase transcriptome rearrangement we described previously<sup>19</sup> (Fig. S3).  
 105 This was followed by several smaller waves of expression change during the rest of  
 106 prophase I, a remarkably static transcriptome from metaphase I through early  
 107 unicellular microspores (UMs), and another large shift in expression between UMs and  
 108 bicellular microspores (BMs). We find distinct temporal expression patterns for many  
 109 gene categories (Table S2-S3), including transcription factors, genes involved in meiotic  
 110 recombination and synapsis (Fig. S4), and phased small RNA precursors (Fig. S5). This

dataset provides an extensive time course of gene expression throughout meiosis and pollen development.

## **Timing and extent of haploid expression**

To follow the shift from diploid to haploid expression, we first compared the proportion of genes with biallelic and monoallelic expression in individual precursors at each stage (Fig. 2a). Genes were categorized as expressed monoallelically if they had >80% of transcripts from a single allele and as biallelically otherwise. We observed biallelic expression for the majority of genes during meiosis I (median of 83.5% biallelic genes per cell; Fig. 2a), while the cells were still diploid. Surprisingly, cells at the haploid tetrad and UM stages continued to display a similar level of biallelic expression, with a median of 82.5% biallelic-expressed genes per cell (interquartile range: 79.6% to 84.5%). Thus, pre-meiotic (biallelic) transcripts persist until the end of the UM stage, 11 days after meiosis. Subsequently, there was a rapid conversion to monoallelic expression around pollen mitosis I (PMI), with a median of 99.1% and 99.5% monoallelic-expressed genes in BMs and pollen grains, respectively. Linked genes were consistently expressed from the same allele in BMs and pollen but not earlier stages (Fig. 2a, right; Fig. S6), a characteristic sign of expression from the haploid genome. We conclude that the haploid microspore is heavily provisioned with sporophytic transcripts, followed by a sharp transition to gametophytic expression around PMI.

While most genes had biallelic expression through PMI, does a gene cohort exist with earlier expression from the haploid genome? To answer this, we needed to distinguish haploid expression from other causes of monoallelic expression for individual genes. One unique characteristic of haploid expression is that it does not produce any bias towards a specific allele; haploid-expressed transcripts will match the A188 allele in some precursors, but the B73 allele in others, depending on the precursor haplotype. Most other causes of monoallelic expression, in contrast, result in a consistent skew towards

one allele. For instance, in diploid meiotic cells 5.5% of genes were expressed monoallelically (>80% of transcripts from the most-abundant allele); however, such genes were consistently biased towards either the B73 or A188 alleles and thus can be distinguished from haploid expression (Fig. 2b). In UMs, 90.0% of genes had biallelic expression and only 0.1% had monoallelic expression (the remaining 9.9% were B73- or A188-biased). In the following stage (BMs) the reverse was true: 0.3% of genes had biallelic expression and 93.3% of genes had monoallelic expression. Thus, the shift to haploid expression is largely all-or-none: we find no evidence for genes that are expressed from the haploid genome prior to PMI or, conversely, that persist as biallelic transcripts beyond PMI. There may be early haploid expressed genes we did not sample here, as only 1068 genes had a sufficient number of genoinformative transcripts in the UM stage to make an inference about haploid expression; however, any such genes would be rare exceptions.

151

## 152 **Conservation of gametophyte-expressed genes**

In many plant species, genes expressed in mature pollen show evidence for increased selection (both purifying and adaptive) compared to genomic background<sup>20,21</sup>. One proposed explanation is that selection may be more efficient on the haploid generation<sup>20,21</sup>. As our data show that the haploid genome becomes active primarily after PMI - midway through pollen development - we asked if there were differences in the average rate of nonsynonymous to synonymous substitutions ( $d_n/d_s$ ) in genes expressed at different times in pollen development. We focused on genes with moderate transcript levels at each stage ( $\geq 100$  TPM) because there was a non-monotonic relationship between expression level and  $d_n/d_s$  at low levels of expression (Fig. S7), complicating the interpretation for low abundance transcripts. Genes with moderate expression after meiosis but not after PMI (i.e. genes expressed in the tetrad or UM stages but not later) showed a similar distribution of  $d_n/d_s$  compared to the genomic background (Fig. 3a and S8). In contrast, genes expressed after PMI had a 30.7% lower median  $d_n/d_s$ , consistent

166 with purifying selection acting in the haploid gametophyte. This stage-dependent change  
167 in  $d_n/d_s$  may be explained by the provisioning of haploid pollen precursors with diploid  
168 transcripts, eliminating heritable phenotypic variation until after PMI.

169 We next estimated the fraction of genes expressed in the diploid sporophyte that might  
170 be subject to haploid selection in pollen. To identify sporophyte-expressed genes, we  
171 obtained expression data from whole seedlings (roots and shoots), defining sporophytic  
172 genes as those expressed in either seedlings or diploid pollen precursors. Consistent  
173 with prior results<sup>4,22,23</sup>, we found that a large fraction of the genome is expressed during  
174 both diploid and haploid stages: 87.3% of genes had detectable transcripts in both the  
175 sporophyte and gametophyte (Fig. 3b) and 54.0% were moderately expressed in both  
176 ( $\geq 100$  TPM; Fig. 3c). Of these, a substantial portion were expressed after PMI and thus  
177 potentially subject to haploid selection (Fig. 3b,c); this subset had a significantly lower  
178 median  $d_n/d_s$  (Fig. 3d). In total, 25,864 genes were detected and 2,447 were moderately  
179 expressed after PMI.

180

## 181 **Widespread gametophyte genome activation at PMI**

182 What is the contribution of new transcription vs transcript turnover to the shift to  
183 haploid expression? RNA dynamics usually cannot be inferred from steady-state  
184 transcript levels alone, because opposing changes in the rate of RNA synthesis and  
185 degradation can produce similar effects on transcript abundance<sup>24</sup>. Our data provide a  
186 way to separate synthesis from degradation, however, because during the haploid phase  
187 any new transcription can only come from one allele. We find that the mean number of  
188 transcripts per precursor changed substantially during pollen development (Fig. 4a),  
189 suggesting large differences in the relative rate of new synthesis vs degradation  
190 between stages. There was a steady decrease in transcripts per cell from the peak  
191 during early meiosis to the minimum at the UM stage. This was followed by a sharp, 7.5-  
192 fold increase in the total number of transcripts per precursor between late UMs and



193 BMs (95% confidence interval (CI) = 3.0 to 14.2-fold; bootstrap test), indicating that  
 194 substantial new transcription may drive the shift to monoallelic expression during this  
 195 period. Indeed, 7,361 genes had a  $\geq 2$ -fold increase in absolute transcript abundance  
 196 between late UMs and BMs (Fig. 4b), with this increase attributable to the more-  
 197 abundant (haploid) allele (Fig. 4c). In contrast, the less-abundant allele remained  
 198 relatively constant between UMs and BMs (median fold change of 0.02; Fig. 4d). This  
 199 suggests that premeiotic (biallelic) transcripts continue to persist into the BM stage for  
 200 many genes, but that a large increase in new transcription overtakes pre-existing  
 201 transcript levels to produce a net shift towards monoallelic expression. We conclude that  
 202 the transition to haploid expression is driven by new transcription and gametophyte  
 203 genome activation, with degradation of sporophytic transcripts playing a relatively  
 204 minor role at the transition.

205 *De novo* motif analysis identified the RY repeat (CATGCA[TG]) as significantly enriched  
 206 in the promoters of the top 200 most upregulated genes, with 35/200 promoters (17.5%)  
 207 having a perfect match to the full RY repeat (6.1-fold enrichment;  $p = 7.1 \times 10^{-15}$ , Fisher's  
 208 exact test) and 72 (36%) containing the minimal 'CATGCA' motif (2.4-fold enrichment;  $p$   
 209  $= 6.2 \times 10^{-9}$ , Fisher's exact test). The RY repeat is the binding site for three paralogous  
 210 transcription factors that regulate embryogenesis in *Arabidopsis*<sup>25</sup> (*ABI3*, *FUS3*, and  
 211 *LEC2*). Although the RY repeat has no known function in pollen development, conserved  
 212 RY repeats have been noted in the pollen-specific  $\beta$ -expansin genes<sup>26</sup>. This sequence may  
 213 serve as the binding site for a transcription factor that contributes to gametophyte  
 214 genome activation. We note that *ABI3* and *ABI19*, two of 4 maize orthologs of  
 215 *FUS3/LEC2*, are specifically expressed in the embryo and late-stage anthers<sup>27</sup>.

216

## 217 **Gene regulation before PMI**

218 Prior to PMI, there appeared to be very little new transcription from the haploid  
 219 genome, as evident in the continued biallelic status of most transcripts (Fig. 2).



220 However, there were still clear changes in relative transcript abundance entering the  
 221 mid- and late-UM stages (Fig. 1f, Table S2-S3). To understand how the transcriptome  
 222 might change in the absence of new transcription, we examined the absolute transcript  
 223 abundance attributable to each allele for UM-expressed genes. Most genes showed  
 224 biallelic transcript loss in UMs, ranging from rapid loss (Fig. S9a) to slower degradation  
 225 over time (Fig. S9b). Thus, differences in mRNA half-life explain some expression  
 226 changes during the UM stage. Surprisingly, there were also many genes with a sharp,  
 227 biallelic increase in transcripts within UMs (Fig. S9c,d). What could cause a biallelic  
 228 transcript increase in a haploid cell? One possibility is that these transcripts were  
 229 synthesized pre-meiotically but then stored and only processed later. Our sequencing  
 230 libraries enrich for polyA<sup>+</sup> RNA and so would not detect stored RNAs with a short or  
 231 missing polyA tail. The storage of un-processed RNAs has been described in other  
 232 pathways such as seed development<sup>28</sup>, and would provide a mechanism to regulate gene  
 233 expression during the UM stage without new transcription from the haploid genome.  
 234 Altogether, our data show that the UM transcriptome is not static despite the lack of  
 235 new transcription.

236

## 237 **Discussion**

238 Here we show that diploid-derived transcripts persist long into haploid phase of maize  
 239 pollen development, followed by a rapid transition to monoallelic expression around  
 240 PMI. We propose to call this the sporophyte-to-gametophyte transition (SGT), in analogy  
 241 to the maternal-to-zygote transition (MZT), as both represent a shift from parent-to-  
 242 offspring expression between generations. The widespread provisioning of the UM with  
 243 sporophytic transcripts indicates a substantial parental investment in the developing  
 244 gametophyte and implies that most cellular processes are under sporophytic control for  
 245 the first half of pollen development.

246 Why might the SGT be delayed until pollen mitosis I? One explanation is that PMI sets  
 247 up the gametophyte germline (generative cell) and soma (vegetative cell). Active  
 248 transcription is associated with an increased mutation rate<sup>29</sup>, and so limiting  
 249 transcription during the UM stage might reduce transcription-coupled DNA damage and  
 250 accessibility of the genome to transposons. After PMI, the somatic vegetative cell is far  
 251 more transcriptionally active than the generative cell<sup>30</sup> and could accommodate  
 252 transcription without an associated risk to the germline. It will be important to establish  
 253 whether SGT timing varies between species and between male and female  
 254 gametophytes. Is PMI a conserved moment of gametophyte genome activation? Or, does  
 255 the SGT occur at different times in distinct plant lineages?

256 The substantial increase in new transcripts around PMI suggests that the SGT is driven  
 257 by gametophyte genome activation resulting in new transcription, although the  
 258 mechanisms of this activation are unknown. It is unlikely that the mitotic division itself  
 259 is required to activate transcription, as vegetative cell-like development continues even  
 260 when PMI is blocked<sup>31-33</sup>, and several gametophytic mutants have been isolated that  
 261 disrupt PMI<sup>7,23</sup>. Our working hypothesis is that the SGT begins immediately before PMI  
 262 rather than during it. Many substantial changes have been observed around PMI,  
 263 including broad shifts in protein and RNA composition<sup>34</sup>, transposon activity (in  
 264 *Arabidopsis*<sup>35</sup>), and histone modifications<sup>36</sup>. There is much to learn about how these  
 265 pathways are coordinated to establish the independence of the gametophyte generation.

266 In predominantly diploid organisms, the scope of haploid selection has long been  
 267 debated<sup>1</sup>. Plants are generally accepted to experience greater haploid selection than  
 268 animals, in part because they require many genes to complete the haploid phase<sup>5-7</sup>. In  
 269 contrast, fully enucleate animal sperm are viable and can fertilize an egg<sup>1</sup>. This  
 270 distinction between kingdoms may be more nuanced than previously thought. A recent  
 271 study found that many genes have haploid-biased expression in mammalian sperm<sup>37</sup>, and  
 272 consequently animal sperm may have a greater amount of heritable phenotypic variation  
 273 than often assumed. Here we demonstrate an absence of haploid transcript

274 accumulation for more than half the haploid phase in maize pollen, limiting the time  
275 period that haploid selection may act in the male plant gametophyte. The ability to  
276 measure allele-specific expression directly in haploid gametes and gametophytes will  
277 provide needed clarity on this small but important stage of the life cycle.

## 278 **Methods**

279

### 280 **Isolating single pollen precursors for RNA-sequencing**

281 Plants were grown in a greenhouse at Stanford, CA with a 14-h 31 °C day at 50%  
 282 summer solar fluence / 10-h 21 °C night. All samples were collected mid-day from an F1  
 283 hybrid between maize (*Zea mays*) inbred lines A188 and B73, with A188 as the female  
 284 parent. Plants were harvested immediately before use, and anthers were dissected from  
 285 the central tassel spike. Anther length was used as a preliminary staging guide, later  
 286 refined by microscopy (see below).

287 For anthers at the tetrad stage and earlier, we found that cells could be mechanically  
 288 released from fixed anthers without requiring enzymatic digestion. Fixation with 3:1  
 289 ethanol:acetic acid preserved RNA quality and was compatible with single-cell library  
 290 preparation. All three anthers from a floret were fixed in 3:1 ethanol:acetic acid on ice  
 291 for 2 h. One anther was withdrawn, rinsed twice in cold phosphate-buffered saline (PBS;  
 292 Sigma-Aldrich P4417), cut transversely with a #11 scapel, and gently pressed to release  
 293 developing meiotic cells. Single meiotic cells were identified by their large size and  
 294 distinctive morphology and manually retrieved with a 33 gauge syringe needle. The cells  
 295 were then washed in PBS and placed individually on the cap of an 8-tube PCR strip  
 296 (Axygen Low Profile 8-Strip PCR Tubes; Fisher Scientific 14-223-505). The presence of a  
 297 single meiotic cell without attached debris was confirmed microscopically during both  
 298 pick-up and release (10X magnification, Nikon Diaphot). Cells in the dyad or tetrad stage  
 299 often remained attached after release from the anther; they were aspirated up and down  
 300 with the syringe needle to liberate individual cells prior to isolation. After isolating a set  
 301 of 8 cells, the PCR caps were attached to PCR tubes, flash frozen in liquid nitrogen, and  
 302 stored at -80 °C.

303 For anthers at the unicellular microspore stage and later, the developing pollen  
 304 precursors were loosely associated with the anther wall and could be released

mechanically without enzymes or fixation. Two of three anthers from a floret were fixed in 3:1 ethanol:acetic acid and stored for microscopy. The remaining (unfixed) anther was cut transversely with a #11 scapel, then gently pressed in a drop of PBS to release pollen precursors. Single precursors were aspirated with a blunted 29 gauge needle (for unicellular or bicellular microspores) or 26 gauge needle (for mature pollen), placed on the cap of an 8-tube PCR strip, and flash frozen as described above. Anther lengths were measured with a stage micrometer (Fisher Scientific) as listed in Table S1.

312

### 313 **Cytological staging and image acquisition**

Fixed anthers were washed in ice cold PBS and placed on a glass slide in a drop of PBS with 10 µg/mL Hoechst 33342 (Sigma-Aldrich). Anthers were then mechanically macerated with a scapel to release pollen precursors, and a #1.5 coverslip (Zeiss) was placed on top. Images were taken with a Leica SP8 confocal laser-scanning microscope using a 40X 1.2 n.a. glycerin immersion objective and a 405 nm excitation laser. Anther stage was scored based on the morphology of the Hoechst-stained chromosomes using previously defined criteria<sup>19,38</sup>. All cytological staging was performed blind to sample identity (i.e. without knowledge of anther length, gene expression, or other sample information).

323

### 324 **Illumina library preparation**

Sequencing libraries were prepared by CEL-seq2<sup>39</sup> as described previously<sup>19</sup> with one addition: previously, we noticed that the read distribution was uneven within these libraries, with reads often mapping to one or a few specific positions on a transcript. We suspected this occurred during reverse transcription of the amplified RNA library, a step that uses a random hexamer primer with a long overhanging sequence at the 5' end (5'-GCCTTGGCACCCGAGAATTCCANNNNNN, the overhang is underlined). This overhanging sequence may hybridize to specific areas of the transcript, leading to

332 preferential binding at those sequences. To avoid this problem, we modified the reverse  
333 transcription primer to the following:

334 5'-gaautcucggguGCCTTGGCACCCGAGAATTCCANNNNNN (original overhang is  
335 underlined; newly added sequence is in lower case)

336 The new nucleotides on the 5' end form a hairpin with the overhang sequence, blocking  
337 this overhang from contributing to priming during reverse transcription. After the  
338 reverse transcription step, the hairpin would inhibit downstream PCR reactions and  
339 must be removed. To remove the hairpin, the library was treated with a 1:20 dilution of  
340 USER enzyme (New England Biolabs) at 37 °C for 30 min; USER cuts DNA at uracil  
341 bases, thus degrading the hairpin portion of the primer. In test libraries, this  
342 modification produced a more even size distribution of amplified products. After the  
343 modified second reverse transcription step, library preparation was continued as  
344 described<sup>19</sup>. Libraries were sequenced on an Illumina NovaSeq or HiSeq 4000  
345 instrument by Novogene Corporation (Sacramento, CA) using paired-end 150 bp reads.

346

### 347 **Allele-specific transcript quantification**

348 The first read of each read-pair contained a cell-specific barcode and a 10 bp unique  
349 molecular identifier<sup>40</sup> (UMI), while the second read contained transcript sequence.  
350 Paired-end reads were demultiplexed based on the cell-specific barcodes, requiring a  
351 perfect match to one of the expected barcode sequences (Table S4). Then the UMIs from  
352 read 1 were extracted and appended to the read 2 sequence identifiers. The remainder  
353 of processing was performed using the demultiplexed second reads. Prior to alignment,  
354 reads were trimmed and filtered using Fastp v0.20.0<sup>41</sup> with parameters -y -x -3 -f 6. This  
355 removed Illumina adapter sequences and low-quality reads (Phred <= 15), removed the  
356 first 6 bases from the 5' end, and trimmed poly-X sequences and low quality bases from  
357 the 3' end.

Genome sequences were obtained for the B73 reference genome<sup>42</sup> (AGPv4) and A188 genome<sup>43</sup>. To avoid bias in aligning B73 vs A188 alleles to the genome, the B73 genome was masked by replacing single-nucleotide polymorphisms (SNPs) that differ between the A188 and B73 genomes with Ns. Reads were then aligned to the masked B73 reference genome using Hisat2 v2.1.0<sup>44</sup>. Mapped reads were assigned to a gene if they overlapped the annotated gene locus. After alignment, SNPsplit v0.3.2<sup>45</sup> was used to analyze the previously masked SNP positions and split the reads into four categories: those matching the A188 genome, those matching the B73 genome, those lacking SNPs that could separate the two alleles (“unassigned” reads), and those with conflicting SNPs (“conflicting” reads).

For transcript counting, reads mapping to the same gene with a similar UMI were collapsed using the UMI-tools v1.0.0<sup>46</sup> dedup function; this algorithm uses graph-based clustering to group reads with similar UMIs while accounting for potential sequencing errors. In cases in which multiple reads were associated with a single transcript, the allele calls for these reads were pooled as follows: if all reads were “unassigned”, then the transcript was labeled as “unassigned”; if all reads were assigned to only one of the two alleles (i.e. only A188 or only B73) or were unassigned, then the transcript was assigned to that allele (e.g. if there were three reads associated with a transcript, including two unassigned reads and one assigned to A188, then the transcript was assigned to A188); if any read was “conflicting” or if there were both A188 and B73-assigned reads, then the transcript was labeled as “conflicting”. In total, 66.0% of transcripts were unassigned, 33.4% were assigned to the A188 or B73 allele, and 0.58% were conflicting.

381

## 382 **Quality control**

Three lanes of sequencing were obtained for this study. For all lanes, samples with under 2,000 UMIs were discarded. There were also additional quality control criteria



385 applied to lanes 1 and 3: For lane 1, there was evidence of an Illumina index-hopping  
 386 artifact where a subset of reads were misannotated to the incorrect sample during  
 387 sequencing (see below and Supplementary Note 1); additional samples were excluded  
 388 from this lane to reduce the impact of index hopping (Supplementary Note 1). For lane 3,  
 389 there appeared to be a library synthesis problem in many of the libraries, as 68 samples  
 390 (72%) were below the 2000 UMI threshold and many other samples were marginally  
 391 above it. From this lane, we kept only 7 samples that had good sequence diversity (Table  
 392 S1); these samples contained 87% of all reads from the lane and had a median of  
 393 155,521 transcripts per sample, compared to a median of 498 for the excluded samples.  
 394 Lane 2 was obtained under conditions where the index-hopping artifact was reduced and  
 395 contained good sequence diversity; no additional quality control criteria were applied to  
 396 this lane.

397

### 398 **Illumina index-hopping**

399 Since the introduction of patterned flow cells, Illumina instruments have suffered from  
 400 an index-hopping artifact in which the multiplexed sample barcodes can be exchanged  
 401 during sequencing, leading to a fraction of reads being assigned to the wrong  
 402 sample<sup>47,48</sup>. There was evidence of this artifact in our data, including larger than  
 403 expected correlations between samples with certain barcode combinations  
 404 (Supplementary Note 1) and a small but significant number of reads mapping to  
 405 impossible barcode combinations (combinations of CEL-seq and Illumina barcodes that  
 406 were not used in the experiment). Several steps were taken to mitigate the impact of  
 407 index-hopping and ensure that our conclusions were robust to this artifact; these include  
 408 correcting the data using methods to discard reads that likely arise from index-  
 409 hopping<sup>48</sup>, excluding samples that had a higher likelihood of index-hopping artifacts,  
 410 and, importantly, confirming the findings with independent RNA-sequencing data  
 411 obtained under conditions where index-hopping was minimized. A further discussion of  
 412 these issues is provided in Supplementary Note 1.

## 413 **Refining developmental stages using gene expression**

414 Pollen precursors were first assigned a developmental stage by microscopy, and then  
 415 ordered within a stage using ‘pseudotime’ – a dimensionality reduction technique to  
 416 infer the temporal order of samples based on gene expression<sup>49</sup>. To calculate  
 417 pseudotime, expression data were first normalized to transcripts per million (TPM).  
 418 Then the data were log-transformed after adding a pseudocount of 148.4; this  
 419 pseudocount corresponds to 1 transcript per cell in a cell at the 10<sup>th</sup> percentile of total  
 420 detected transcripts. Genes were filtered to remove any that did not have at least 10  
 421 UMIs in at least 10 pollen precursors. Next, the 2000 most variable genes were selected  
 422 (as measured using the Fano factor), and the data were transformed into principal  
 423 components (PCs). Finally, a principal curve was fit to the top 10 PCs using the R  
 424 package prncurve<sup>50</sup>. Pseudotime was calculated separately for cells in meiosis and for  
 425 haploid pollen precursors (tetrad stage and beyond).

426 Periods of more rapid gene expression change were then identified using ‘pseudotime  
 427 velocity’<sup>19</sup>. Pseudotime velocity calculates the rate of change in pseudotime of adjacent  
 428 ordered cells, reaching a larger value when gene expression changes more abruptly.  
 429 Peaks in pseudotime velocity were selected as stage boundaries to divide unicellular  
 430 microspores into early, middle, and late substages (Fig. 1f). The heatmap of expression  
 431 along with pseudotime velocity (Fig. 1f) was plotted using the R package  
 432 ‘ComplexHeatmap’<sup>51</sup>.

433

## 434 **Differential gene expression**

435 Bootstrapping was used to estimate the mean log-transformed change in expression  
 436 level between consecutive developmental stages. The following six stage comparisons  
 437 were made: (i) early leptotene vs pachytene, (ii) pachytene vs M1, (iii) early UM vs mid  
 438 UM, (iv) mid UM vs late UM, (v) late UM vs BM, and (vi) BM vs pollen. Bootstrapping *p*-  
 439 values were adjusted for multiple hypothesis testing using the Benjamini-Hochberg

440 procedure. Genes with an average expression level of less than 1 transcript per single  
441 pollen precursor were excluded from analysis. Differential expression was calculated  
442 using both the absolute numbers of transcripts per precursor (Table S2) and TPM-  
443 normalized data (Table S3).

444

## 445 **Quantifying the fraction of biallelic-expressed genes**

446 Biallelic-expressed genes were defined as those genes with under 80% of transcripts  
447 from the most-common allele. The fraction of biallelic-expressed genes in a pollen  
448 precursor was calculated using genes with at least 10 genoinformative transcripts in  
449 that precursor. Genes were excluded from these calculations if >90% of all transcripts in  
450 the entire dataset came from the same parental allele (either A188 or B73).

451

## 452 **Seedling RNA-seq data**

453 To determine seedling-expressed genes, 10-day-old whole seedlings (roots and shoots)  
454 were frozen in liquid nitrogen and ground to a fine powder with a mortar and pestle.  
455 RNA was extracted using a Qiagen RNeasy Plant Mini Kit according to manufacturer  
456 instructions and sequencing libraries were prepared and analyzed as described for  
457 pollen precursors.

458

## 459 **Conservation of gametophyte-expressed genes**

460 The ratio of nonsynonymous substitution per nonsynonymous site ( $d_n$ ) to synonymous  
461 substitution per synonymous site ( $d_s$ ) was calculated for all orthologous gene pairs  
462 between maize and other grasses with the CoGe SynMap2 tool<sup>52</sup> (genomevolution.org),  
463 using the masked *Zea mays* v4 genome (id52733), *Sorghum bicolor* v3 genome  
464 (id31607), *Oryza sativa* v7 genome (id16890), and *Brachypodium distachyon* v3 genome  
465 (id39836). To avoid analyzing substitutions between non-orthologous gene pairs,

putative orthologs were only considered if they were reciprocal best hits and shared at least 80% nucleotide identity.

Gametophyte-expressed genes were defined as those expressed in the haploid stages of pollen development (tetrad, UM, BM, and Pollen) at an expression threshold of 0 TPM (for Fig. 3b) or 100 TPM (for Fig. 3c-d). Sporophyte genes were defined as those genes expressed in diploid pollen precursors (meiosis or pre-meiotic interphase) or in seedlings using the same expression cutoffs. At either expression cutoff, there was a subset of genes expressed exclusively in the tetrad and/or UM stages. It was ambiguous how to classify these genes, as they were found only in the haploid gametophyte stage but were most likely expressed from the diploid sporophyte genome (see Results). All genes in this category with  $\geq 10$  genoinformative transcripts had transcripts matching both alleles. In Fig. 3b-d, we categorized this group as expressed in both the sporophyte and gametophyte (but before PMI) as we suspect they were synthesized before the end of meiosis. The conclusions do not change if a different categorization is chosen.

480

# ***De novo* motif analysis**

MEME 5.3.3<sup>53</sup> was used for *de novo* motif discovery in the promoters of the top 200 genes upregulated during PMI using parameters -dna -mod anr -nmotifs 10 -minw 6 -maxw 15 -objfun classic -revcomp -markov\_order 0. The top 200 genes were defined as those with the greatest increase in absolute transcript abundance between late UMs and BMs with a false discovery rate cutoff of 0.01 (Table S2). Promoters were defined as the first 500 bp upstream of the transcription start site for each gene. The top three motifs were far more significant than all the others: 'AWAAAAAAAAWATAAA' (E-value =  $7.6 \times 10^{-56}$ ), 'CCBSCBCCBCKCSC' (E-value =  $2.4 \times 10^{-42}$ ), and 'CATGCATGCA' (E-value =  $3.8 \times 10^{-31}$ ). As the first two were long polynucleotide stretches (polyA and polyC), only the RY repeat ('CATGCATGCA') was considered further. Separate from *de novo* motif discovery, we estimated the enrichment of the RY repeat (using the smaller established motif

sequences: CATGCATG and CATGCA) in the promoters of upregulated genes compared to a background gene set of 5099 genes. The background genes were selected based on their low expression in the BM stage ( $< 10$  TPM) and an expression level between 4 and 900 TPM in seedlings and/or pollen precursors. These expression cutoffs match the expression level to the upregulated geneset, as the upregulated genes had a mean expression between 4 and 900 TPM across pollen precursors.

## Statistical methods

Significance in the difference in  $d_n/d_s$  between stages (Fig. 3 and S8) was calculated with a two-sided Wilcoxon signed-rank test. For analyses with more than 2 comparisons, p-values were adjusted for multiple hypothesis testing using Holm's method.

Differentially expressed genes (Tables S2 and S3) were determined by bootstrapping, as described in the section "Differential gene expression". A total of 1,728,000 bootstrap replicates were performed and the resulting p-values were adjusted for multiple hypothesis testing using the Benjamini-Hochberg procedure (False Discovery Rate).

The trimmed mean (trim = 0.2) and standard error for the number of transcripts expressed per stage were estimated by bootstrapping, with 2000 bootstrap replicates. The number of samples in each stage can be found in Table S1, which contains full sample metadata for both included and excluded samples (i.e. samples that failed to meet the quality control criteria). All samples were distinct measurements; some samples were collected from the same plant or anther, as described in Table S1. In total, a median of 20 samples passed quality control per stage (range: 7, 88), collected from 67 anthers and 25 plants.

## Data availability

Sequencing data are deposited to the Gene Expression Omnibus (accession no. GSE175916) and will be made public after peer review.

520 **Acknowledgements:** We thank J. Ross-Ibarra and E. Josephs for helpful discussions; J.  
 521 Dinneny for use of the SP8 confocal microscope; and S. Liu for providing the A188  
 522 genome sequence ahead of publication. This work was supported by National Science  
 523 Foundation award 17540974.

524

525 **Author Contributions:** B.N. and V.W. designed experiments, discussed results, and  
 526 wrote the manuscript. B.N. conceived the project, performed experiments, and  
 527 conducted data analysis.

528

529 **Competing interests:** The authors declare no competing interests.

## 530 **References**

- 531
- 532 1. Immler, S. Haploid selection in “diploid” organisms. *Annu. Rev. Ecol. Evol. Syst.* **50**, 1–18 (2019).
- 533 2. Mulcahy, D. L., Sari-Gorla, M. & Mulcahy, G. Pollen selection - Past, present and future. *Sex. Plant*
- 534 *Reprod.* **9**, 353–356 (1996).
- 535 3. Beaudry, F. E. G., Rifkin, J. L., Barrett, S. C. H. & Wright, S. I. Evolutionary genomics of plant
- 536 gametophytic selection. *Plant Commun.* **1**, 100115 (2020).
- 537 4. Tanksley, S., Zamir, D. & Rick, C. Evidence for extensive overlap of sporophytic and gametophytic gene
- 538 expression in *Lycopersicon esculentum*. *Science* **213**, 453–455 (1981).
- 539 5. Khush, G. S. Studies on the linkage map of chromosome 4 of the tomato and on the transmission of
- 540 induced deficiencies. *Genetica* **38**, 74–94 (1967).
- 541 6. Kindiger, B., Beckett, J. B. & Coe, E. H. Differential effects of specific chromosomal deficiencies on the
- 542 development of the maize pollen grain. *Genome* **34**, 579–594 (1991).
- 543 7. Boavida, L. C. *et al.* A collection of Ds insertional mutants associated with defects in male gametophyte
- 544 development and function in *Arabidopsis thaliana*. *Genetics* **181**, 1369–1385 (2009).
- 545 8. Armbruster, W. S. & Rogers, D. G. Does pollen competition reduce the cost of inbreeding? *Am. J. Bot.*
- 546 **91**, 1939–1943 (2004).
- 547 9. Mulcahy, D. L. Correlation between speed of pollen tube growth and seedling height in *Zea mays L.*
- 548 *Nature* **249**, 491–493 (1974).
- 549 10. Sandler, G., Beaudry, F. E. G., Barrett, S. C. H. & Wright, S. I. The effects of haploid selection on Y
- 550 chromosome evolution in two closely related dioecious plants. *Evol. Lett.* **2**, 368–377 (2018).
- 551 11. Lenormand, T. & Dutheil, J. Recombination difference between sexes: A role for haploid selection. *PLoS*
- 552 *Biol.* **3**, e63 (2005).
- 553 12. Domínguez, E., Cuartero, J. & Fernández-Muñoz, R. Breeding tomato for pollen tolerance to low
- 554 temperatures by gametophytic selection. *Euphytica* **142**, 253–263 (2005).
- 555 13. Clarke, H. J., Khan, T. N. & Siddique, K. H. M. Pollen selection for chilling tolerance at hybridisation
- 556 leads to improved chickpea cultivars. *Euphytica* **139**, 65–74 (2004).
- 557 14. Warman, C. *et al.* High expression in maize pollen correlates with genetic contributions to pollen fitness
- 558 as well as with coordinated transcription from neighboring transposable elements. *PLoS Genet.* **16**,
- 559 e1008462 (2020).
- 560 15. Hsu, S., Huang, Y. & Peterson, P. Development pattern of microspores in *Zea mays L.* - the maturation of
- 561 upper and lower florets of spikelets among an assortment of genotypes. *Maydica* **33**, 77–98 (1988).
- 562 16. Schulz, K. N. & Harrison, M. M. Mechanisms regulating zygotic genome activation. *Nat. Rev. Genet.* **20**,
- 563 221–234 (2019).



- 564 17. Sidhu, G. K., Fang, C., Olson, M. A., Falque, M. & Martin, O. C. Recombination patterns in maize reveal  
565 limits to crossover homeostasis. *Proc. Natl. Acad. Sci.* **112**, (2015).
- 566 18. Kianian, P. M. A. *et al.* High-resolution crossover mapping reveals similarities and differences of male  
567 and female recombination in maize. *Nat. Commun.* (2018). doi:10.1038/s41467-018-04562-5
- 568 19. Nelms, B. & Walbot, V. Defining the developmental program leading to meiosis in maize. *Science* **364**,  
569 52–56 (2019).
- 570 20. Gossmann, T. I., Schmid, M. W., Grossniklaus, U. & Schmid, K. J. Selection-driven evolution of sex-  
571 biased genes is consistent with sexual selection in *Arabidopsis thaliana*. *Mol. Biol. Evol.* **31**, 574–583  
572 (2014).
- 573 21. Arunkumar, R., Josephs, E. B., Williamson, R. J. & Wright, S. I. Pollen-specific, but not sperm-specific,  
574 genes show stronger purifying selection and higher rates of positive selection than sporophytic genes in  
575 *Capsella grandiflora*. *Mol. Biol. Evol.* **30**, 2475–2486 (2013).
- 576 22. Chetoor, A. M. *et al.* Discovery of novel transcripts and gametophytic functions via RNA-seq analysis of  
577 maize gametophytic transcriptomes. *Genome Biol.* **15**, 1–23 (2014).
- 578 23. Twell, D., Oh, S. A. & Honys, D. Pollen development, a genetic and transcriptomic view. in *The Pollen*  
579 *Tube. Plant Cell Monographs* (ed. Malhó, R.) **3**, 15–45 (2006).
- 580 24. Honkela, A. *et al.* Genome-wide modeling of transcription kinetics reveals patterns of RNA production  
581 delays. *Proc. Natl. Acad. Sci. U. S. A.* **112**, 13115–13120 (2015).
- 582 25. Jia, H., Suzuki, M. & Mccarty, D. R. Regulation of the seed to seedling developmental phase transition  
583 by the LAFL and VAL transcription factor networks. *Wiley Interdiscip. Rev. Dev. Biol.* **3**, 135–145 (2014).
- 584 26. Valdivia, E. R., Sampedro, J., Lamb, J. C., Chopra, S. & Cosgrove, D. J. Recent proliferation and  
585 translocation of pollen group 1 allergen genes in the maize genome. *Plant Physiol.* **143**, 1269–1281  
586 (2007).
- 587 27. Stelpflug, S. C. *et al.* An expanded maize gene expression atlas based on RNA-sequencing and its use to  
588 explore root development. *Plant Genome* **9**, (2016).
- 589 28. Harris, B. & Dure, L. I. Developmental regulation in cotton seed germination: Polyadenylation of stored  
590 messenger RNA. *Biochemistry* **17**, 3250–3256 (1978).
- 591 29. Kim, N. & Jinks-Robertson, S. Transcription as a source of genome instability. *Nat. Rev. Genet.* **13**, 204–  
592 214 (2012).
- 593 30. McCormick, S. Male gametophyte development. *Plant Cell* **5**, (1993).
- 594 31. Eady, C., Lindsey, K. & Twell, D. The significance of microspore division and division symmetry for  
595 vegetative cell-specific transcription and generative cell differentiation. *Plant Cell* **7**, 65–74 (1995).
- 596 32. Zhang, J. *et al.* Sperm cells are passive cargo of the pollen tube in plant fertilization. *Nat. Plants* **3**, 1–5  
597 (2017).

- 598 33. Glöckle, B. *et al.* Pollen differentiation as well as pollen tube guidance and discharge are independent of  
599 the presence of gametes. *Dev.* **145**, (2018).
- 600 34. Bedinger, P. A. & Edgerton, M. D. Developmental staging of maize microspores reveals a transition in  
601 developing microspore proteins. *Plant Physiol.* **92**, 474–479 (1990).
- 602 35. Slotkin, R. K. *et al.* Epigenetic reprogramming and small RNA silencing of transposable elements in  
603 pollen. *Cell* **136**, 461–472 (2009).
- 604 36. Borg, M. & Berger, F. Chromatin remodelling during male gametophyte development. *Plant J.* **83**, 177–  
605 188 (2015).
- 606 37. Bhutani, K. *et al.* Widespread haploid-biased gene expression enables sperm-level natural selection.  
607 *Science* **371**, eabb1723 (2021).
- 608 38. Dawe, R. K., Sedat, J. W., Agard, D. A. & Cande, W. Z. Meiotic chromosome pairing in maize is  
609 associated with a novel chromatin organization. *Cell* **76**, 901–912 (1994).
- 610 39. Hashimshony, T. *et al.* CEL-Seq2: sensitive highly-multiplexed single-cell RNA-Seq. *Genome Biol.* **17**,  
611 77 (2016).
- 612 40. Kivioja, T. *et al.* Counting absolute numbers of molecules using unique molecular identifiers. *Nat.*  
613 *Methods* **9**, 72–74 (2011).
- 614 41. Chen, S., Zhou, Y., Chen, Y. & Gu, J. Fastp: An ultra-fast all-in-one FASTQ preprocessor. *Bioinformatics*  
615 **34**, i884–i890 (2018).
- 616 42. Jiao, Y. *et al.* Improved maize reference genome with single-molecule technologies. *Nature* **546**, 524–527  
617 (2017).
- 618 43. Lin, G. *et al.* Chromosome-level genome assembly of a regenerable maize inbred line A188. *Genome*  
619 *Biol.* **22**, 1–30 (2021).
- 620 44. Pertea, M., Kim, D., Pertea, G. M., Leek, J. T. & Salzberg, S. L. Transcript-level expression analysis of  
621 RNA-seq experiments with HISAT, StringTie and Ballgown. *Nat Protoc.* **11**, 1650–1667 (2016).
- 622 45. Krueger, F. & Andrews, S. R. SNPsplite: Allele-specific splitting of alignments between genomes with  
623 known SNP genotypes. *F1000Research* **5**, 1–16 (2016).
- 624 46. Smith, T., Heger, A. & Sudbery, I. UMI-tools: Modelling sequencing errors in Unique Molecular  
625 Identifiers to improve quantification accuracy. *Genome Res.* (2017).
- 626 47. Sinha, R. *et al.* Index switching causes “spreading-of-signal” among multiplexed samples in Illumina  
627 HiSeq 4000 DNA sequencing. *bioRxiv* 125724 (2017). doi:10.1101/125724
- 628 48. Griffiths, J. A., Richard, A. C., Bach, K., Lun, A. T. L. & Marioni, J. C. Detection and removal of barcode  
629 swapping in single-cell RNA-seq data. *Nat. Commun.* **9**, 1–6 (2018).
- 630 49. Trapnell, C. *et al.* The dynamics and regulators of cell fate decisions are revealed by pseudotemporal  
631 ordering of single cells. *Nat. Biotechnol.* **32**, 381–386 (2014).
- 632 50. Hastie, T. & Stuetzle, W. Principal curves. *J. Am. Stat. Assoc.* **84**, 502–516 (1989).

- 633 51. Gu, Z., Eils, R. & Schlesner, M. Complex heatmaps reveal patterns and correlations in multidimensional  
634 genomic data. *Bioinformatics* **32**, 2847–2849 (2016).
- 635 52. Lyons, E. & Freeling, M. How to usefully compare homologous plant genes and chromosomes as DNA  
636 sequences. *Plant J.* **53**, 661–673 (2008).
- 637 53. Bailey, T. L. *et al.* MEME Suite: Tools for motif discovery and searching. *Nucleic Acids Res.* **37**, 202–208  
638 (2009).
- 639 54. Zhai, J. *et al.* Spatiotemporally dynamic, cell-type-dependent premeiotic and meiotic phasiRNAs in  
640 maize anthers. *Proc. Natl. Acad. Sci. U. S. A.* **112**, 3146–3151 (2015).

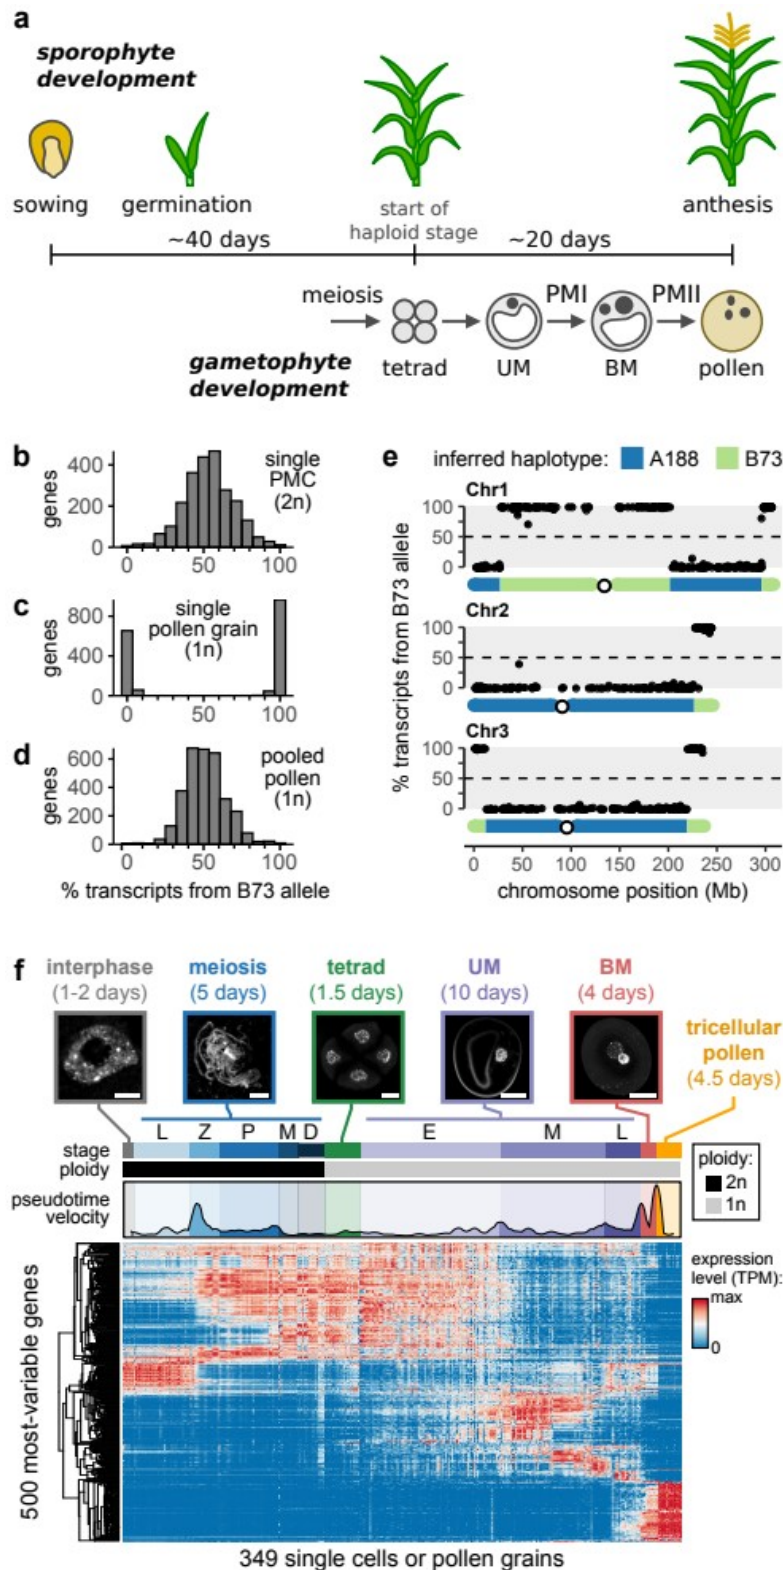

**Figure 1. Allele-specific RNA-sequencing of single pollen precursors.** (a) Timeline of sporophyte and (male) gametophyte development. UM, unicellular microspore; BM, bicellular microspore; PMI/PMI, pollen mitosis I and II. (b-d) Histogram of the fraction

645 of transcripts matching the B73 allele for genes in **(b)** a single diploid pollen mother cell  
646 (PMC), **(c)** a single pollen grain, and **(d)** the average across pollen grains  
647 (computationally “pooled” data). **(e)** Allelic bias of genes correlates with their genomic  
648 location for the first three chromosomes of a single pollen grain. Inferred haplotype is  
649 shown below. In c-f, all genes with at least 10 genoinformative transcripts are shown. **(f)**  
650 Single-cells (UM stage and earlier) and single gametophytes (BM stage and later) were  
651 isolated from maize anthers for RNA-sequencing. Top, exemplar microscopy images of  
652 paired material used for sample staging. Middle, pseudotime velocity, which quantifies  
653 the rate of expression change over time<sup>19</sup>; peaks in pseudotime velocity indicate periods  
654 of rapid gene expression change. Bottom, heatmap of gene expression for the top 500  
655 most-variable genes. Scale bars are 5  $\mu\text{m}$  for interphase and meiosis and 20  $\mu\text{m}$  for later  
656 stages. Substages of meiosis: L, leptotene; Z, zygotene; P, pachytene; M, meiosis I  
657 division; D, dyad. UM substages: E, early; M, middle; L, late.



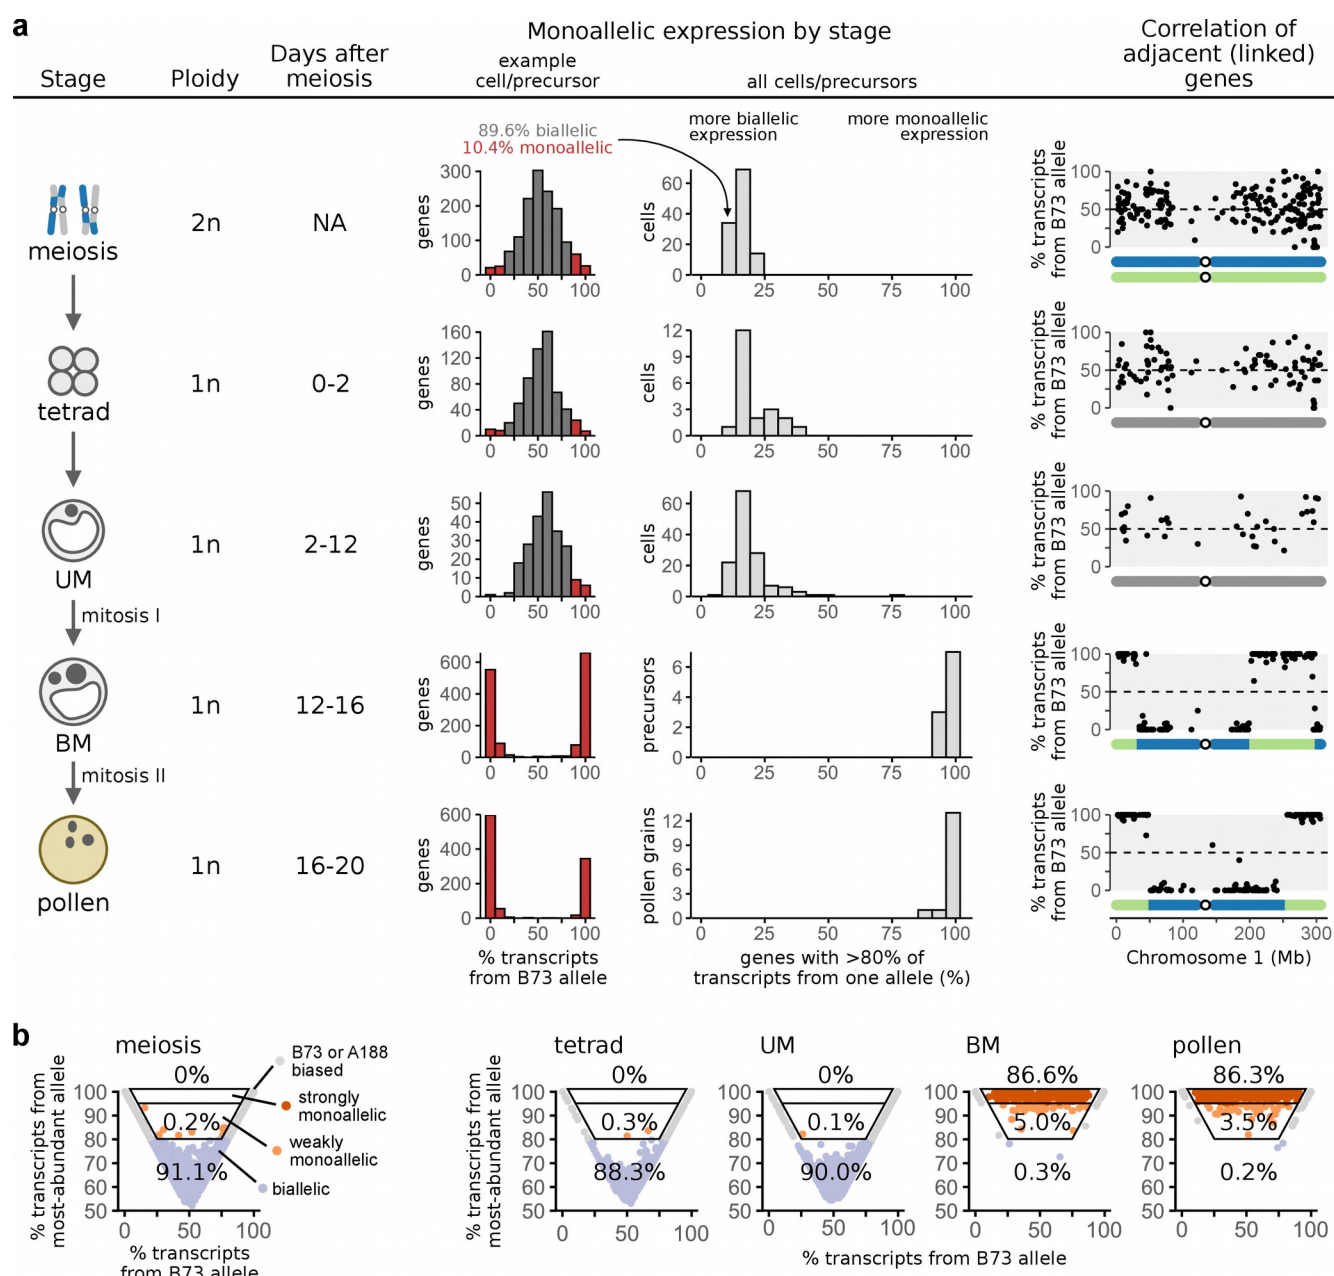

**Figure 2. Timing of haploid expression during pollen development. (a)** Table showing the proportion of monoallelic expression for each stage in pollen development. Column 3: mean days after meiosis when each stage begins and ends<sup>15</sup>. Column 4: histogram of genes, showing the fraction of transcripts matching the B73 allele in a representative precursor. Column 5: histogram of cells/precursors, showing the % of monoallelic genes in all precursors at a given stage. Column 6: % transcripts matching the B73 allele for each gene, by chromosome location. **(b)** Scatter plots showing the mean % of transcripts matching the B73 allele vs the mean % matching the most-abundant allele within a precursor for each gene, by stage. The top two boxed regions highlight genes with strong monoallelic expression (>95% from the most-abundant allele) and moderate monoallelic expression (80%-95% from the most-abundant allele), excluding genes with a consistent bias towards a specific parental allele.

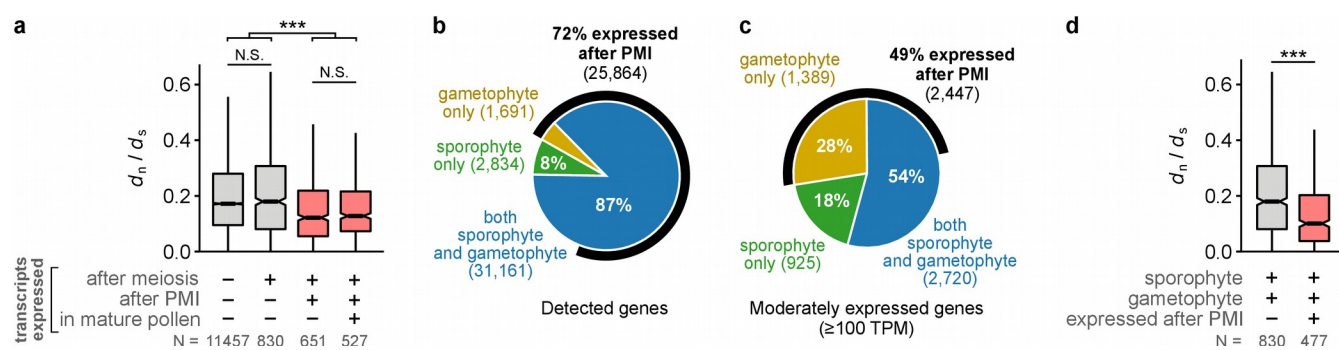

**Figure 3. Conservation of gametophyte-expressed genes.** (a) The ratio of the number of nonsynonymous substitutions per nonsynonymous site ( $d_n$ ) to the number of synonymous substitutions per synonymous site ( $d_s$ ) for genes expressed at different times in pollen development. Gene categories expressed after PMI are highlighted in red. (b,c) Proportion of genes detected (b) or moderately expressed (c) in the sporophyte, gametophyte, or both. The number of genes expressed after PMI are also indicated. (d)  $d_n/d_s$  for genes expressed in both the gametophyte and sporophyte stages, separated based on whether they were expressed after PMI. For (a) and (d), only moderately expressed genes (≥100 TPM) were considered. Boxplots show the median (horizontal line), interquartile range (shaded area; IQR), and whiskers extending up to 1.5 x IQR. Gene categories expressed after PMI are shaded red. \*\*\*,  $p < 0.001$ , Wilcoxon test adjusted for multiple hypothesis testing with Holm's method.



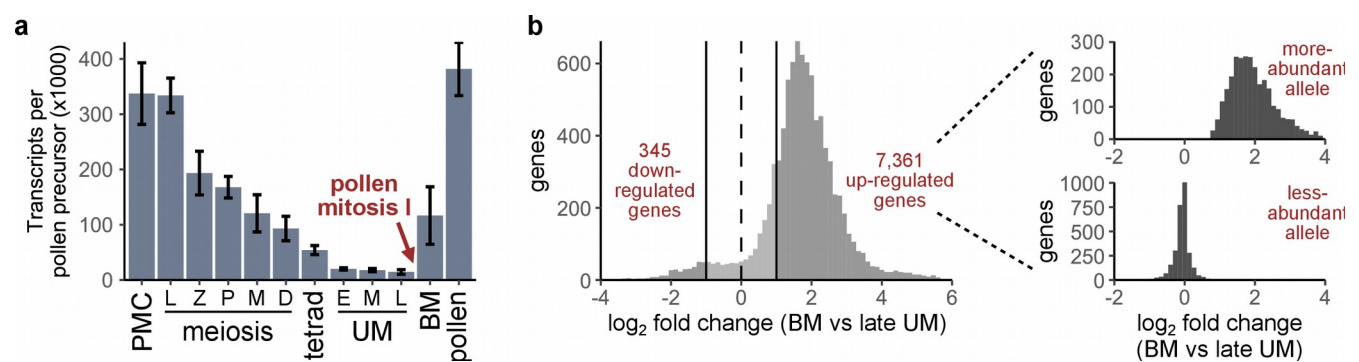

**Figure 4. Widespread gametophyte genome activation at pollen mitosis I. (a)** Total transcripts detected per pollen precursor, by stage. Shown are trimmed means (trim = 0.2) ± standard errors, estimated by bootstrapping. **(b)** Left, log<sub>2</sub> fold change in absolute transcript abundance between the late UM and BM stages for genes with a mean expression level ≥1 transcript per precursor. Right, log<sub>2</sub> fold change in transcript abundance for transcripts mapping to the more- and less-abundant allele (top and bottom, respectively), showing only genes with a 2-fold or greater increase in overall transcript abundance. Up-regulated genes show an increase in transcript levels for the more-abundant (haploid) allele only.

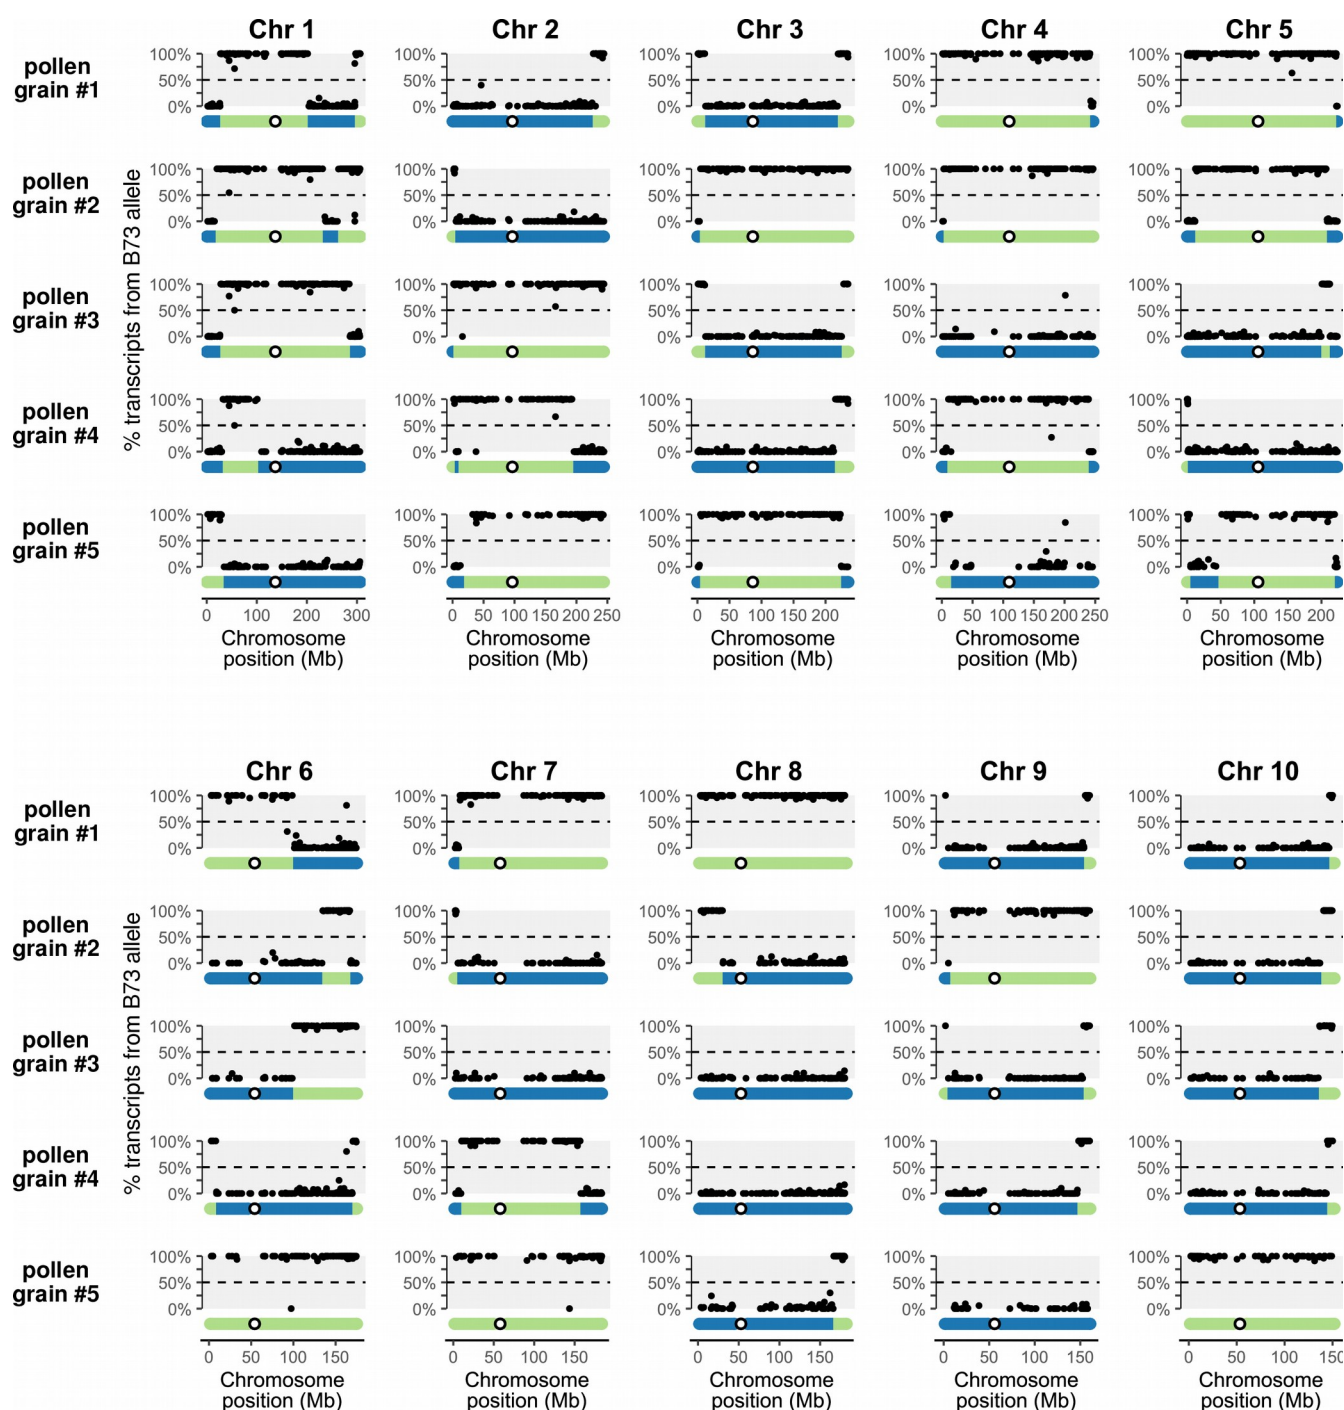

695 **Figure S1. Allelic bias vs chromosomal location for 5 representative pollen**  
696 **grains.** Genes with  $\geq 10$  genoinformative transcripts are shown. Pollen grain #1 is the  
697 same pollen grain analyzed in Fig. 1c,e, here showing the allelic bias across all 10  
698 chromosomes. Inferred haplotypes are depicted below.

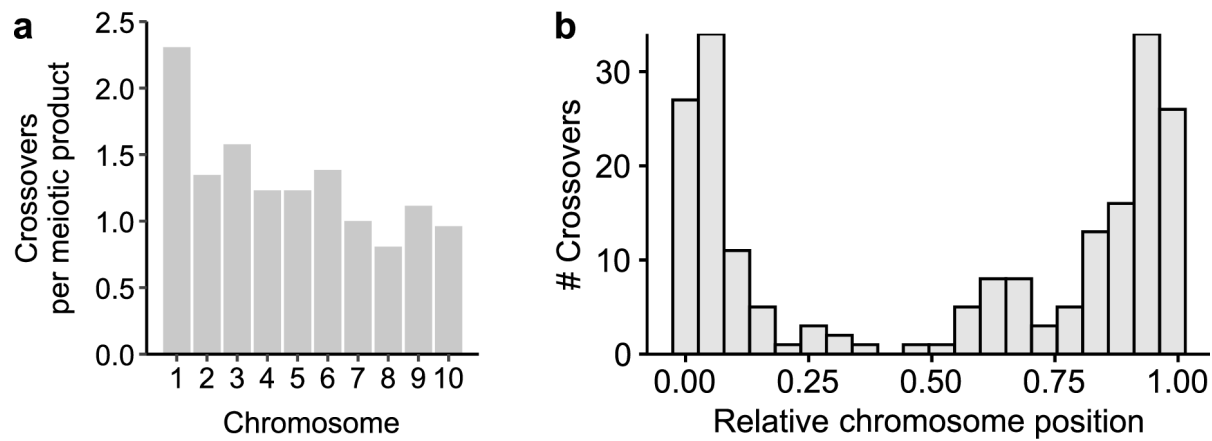

**Figure S2. Crossovers inferred from allele-specific RNA-seq data reproduce known characteristics of maize recombination.** (a) Boxplots showing the number of crossovers inferred for each chromosome per meiotic product (e.g. single pollen grain or microspore). Larger chromosomes had more frequent crossovers, with an overall average of 1.36 crossovers per chromosome. (b) Inferred crossovers were more frequent towards chromosome ends, consistent with the known crossover distribution in maize<sup>18</sup>.

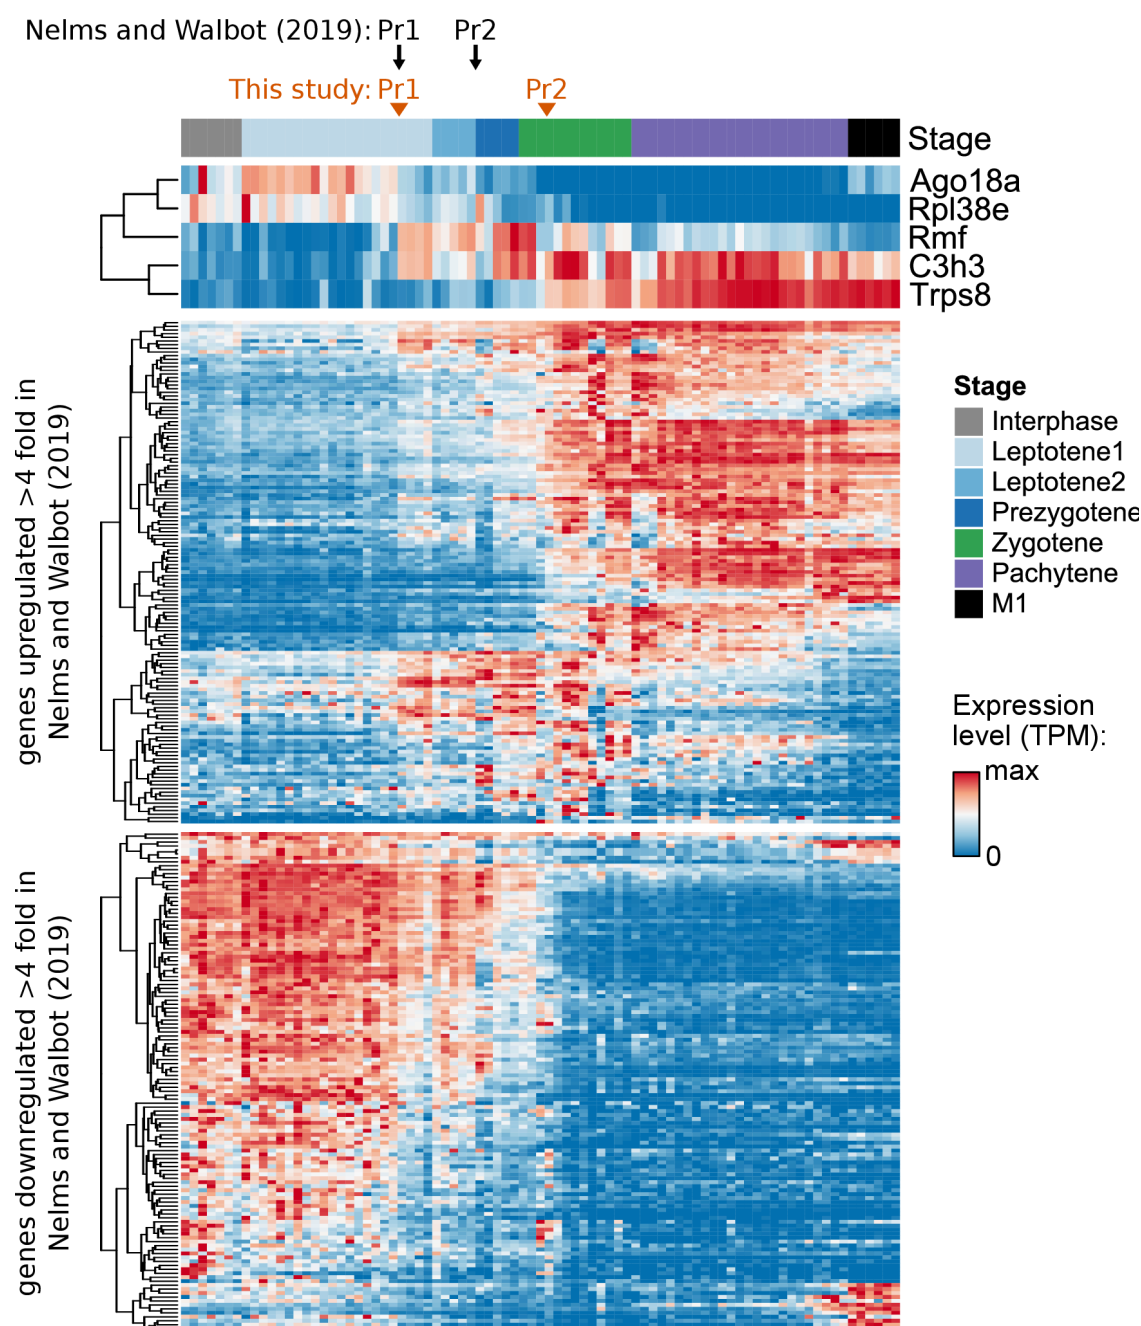

**Figure S3. Comparison with Nelms and Walbot (2019).** We previously observed a large change in gene expression during meiotic prophase I that took place in two steps<sup>19</sup>, labeled “prophase transition 1” and 2 (Pr1 and Pr2). The heatmaps above show the expression of Pr1/Pr2 genes (identified in our previous report) in the newly obtained data. (Top) Expression of Pr1/Pr2 marker genes. (Middle) Expression of genes up-regulated by 4-fold or more during Pr1/Pr2 in ref 19. (Bottom) Expression of genes down-regulated by 4-fold or more during Pr1/Pr2 in ref 19. Nearly all genes were regulated in a similar direction during meiotic prophase I. However, there were important differences in the timing of the Pr1/Pr2 expression changes compared to ref.

716 19: (i) a larger number of genes changed in expression during Pr2 here, while more  
717 genes changed during Pr1 in our previous report; (ii) Pr2 was slightly later in this  
718 dataset, occurring within zygotene. These differences may be the result of variation  
719 between maize inbred lines, as our original data were obtained from the W23 inbred line  
720 while these data were from an A188 x B73 F1 hybrid.



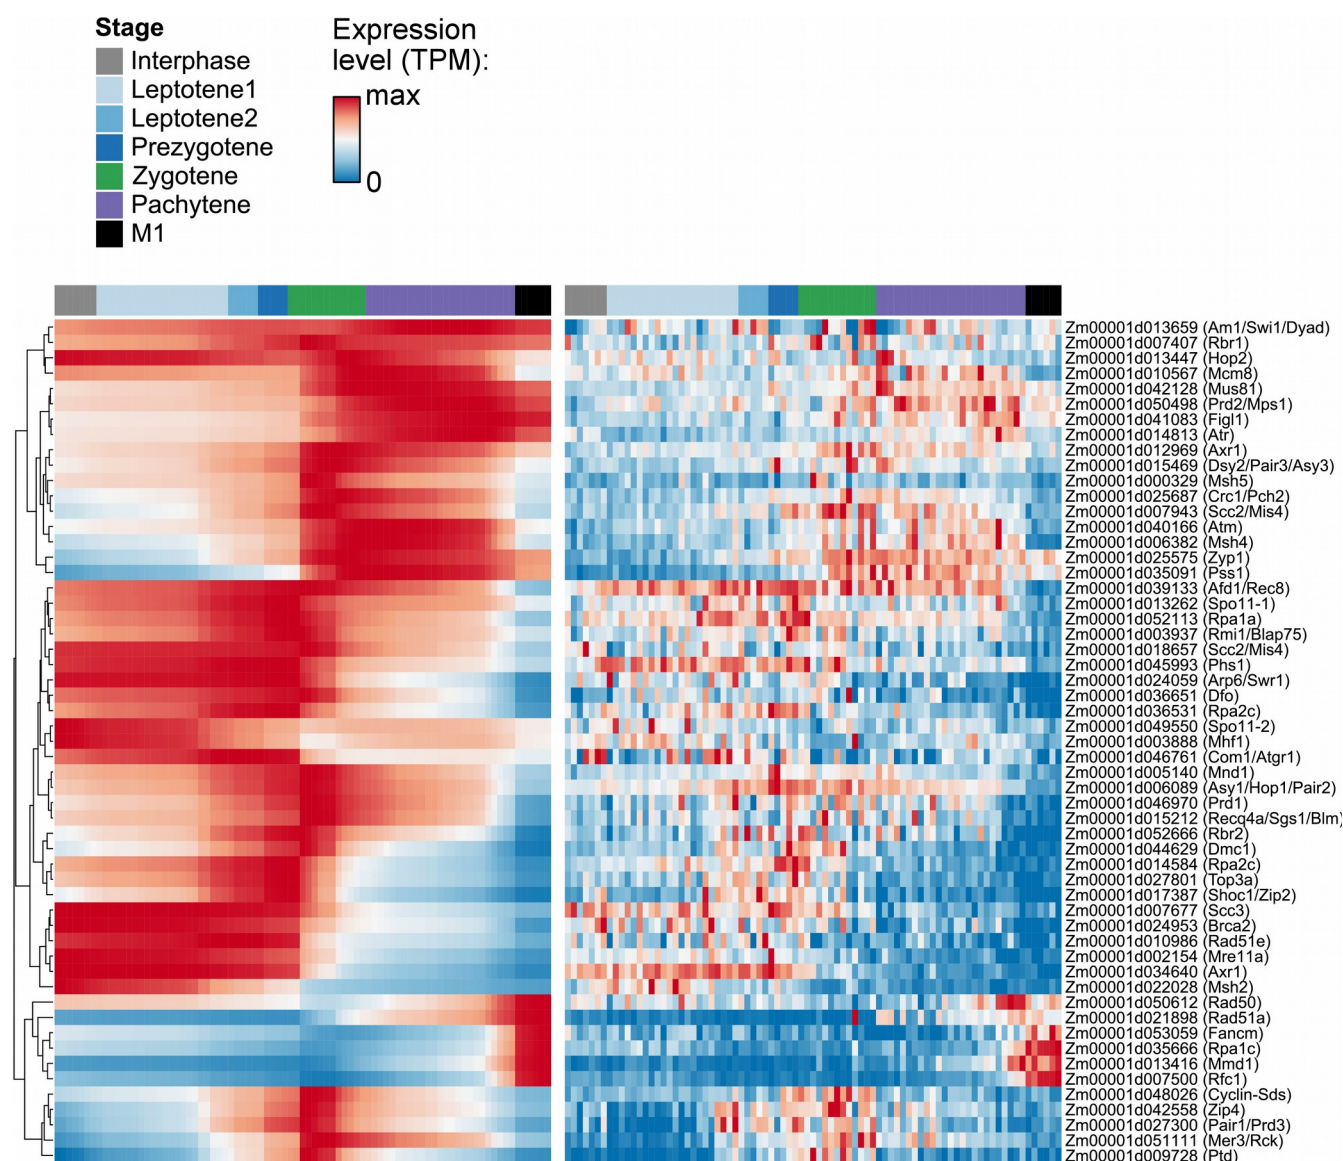

**Figure S4. Expression of meiotic genes.** Heatmap showing the expression of genes with a putative function in meiosis. The heatmap on the right shows the raw transcript counts while the heatmap on the left was smoothed using a 4<sup>th</sup>-degree polynomial to make it easier to visualize trends. Genes were taken from Table S4 of Nelms and Walbot (2019); genes with established functions in maize meiosis as well as potential orthologs of meiotic genes in other species were evaluated.

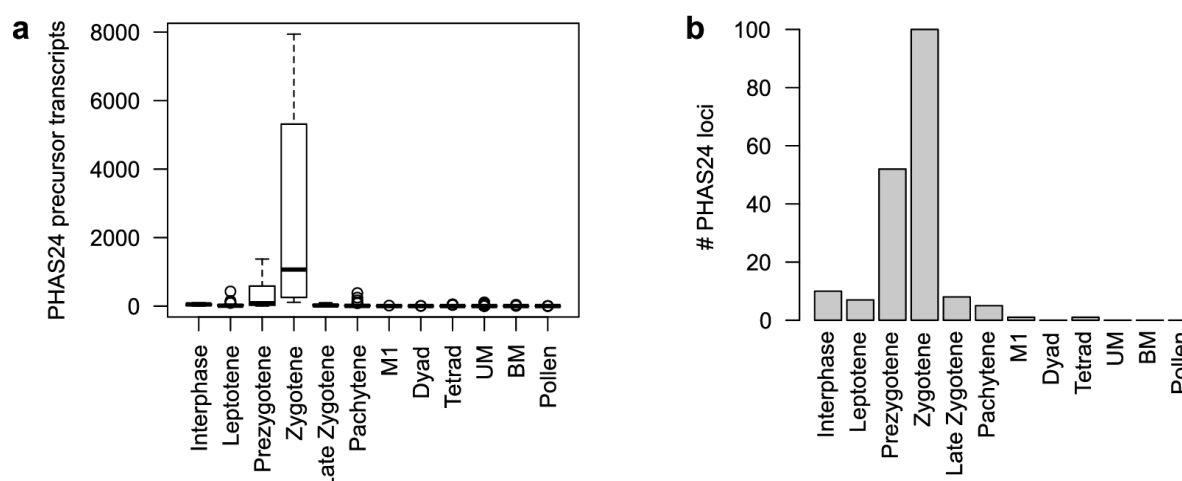

729 **Figure S5. Expression of 24-nucleotide phased small RNA (phasiRNA)**  
730 **precursors. (a)** Total 24-nt phasiRNA precursor transcripts detected by stage. Boxplots  
731 show the median (horizontal line), interquartile range (shaded area; IQR), and whiskers  
732 extending up to 1.5 x IQR. **(b)** Number of 24-nt phasiRNA loci expressed at a level of 1  
733 or more transcripts per pollen precursor. PhasiRNA primary transcripts show a burst of  
734 expression in early meiotic prophase. A total of 119 phasiRNA loci were considered in  
735 this analysis, obtained by remapping previously reported loci<sup>54</sup> from the v3 and v4 maize  
736 genome and excluding any loci that overlap protein-coding genes.



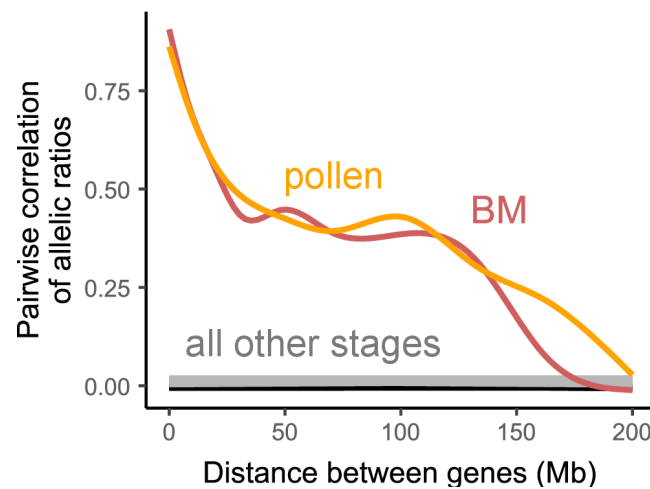

738 **Figure S6. Correlation between allelic ratio and chromosomal distance, by**  
739 **stage.** Allelic ratios were calculated as the number of transcripts with the B73 allele  
740 divided by the total number of genoinformative transcripts for each gene within each  
741 single pollen precursor. Then the Pearson's correlation was calculated between the  
742 allelic ratios for all gene pairs at a given chromosomal distance, and the results were  
743 average for precursors at a developmental stage. Genes located near each other on the  
744 chromosome were more likely to come from the same parental allele in pollen and BM  
745 but not earlier stages. Figure inspired by Bhutani *et al.* (2021).

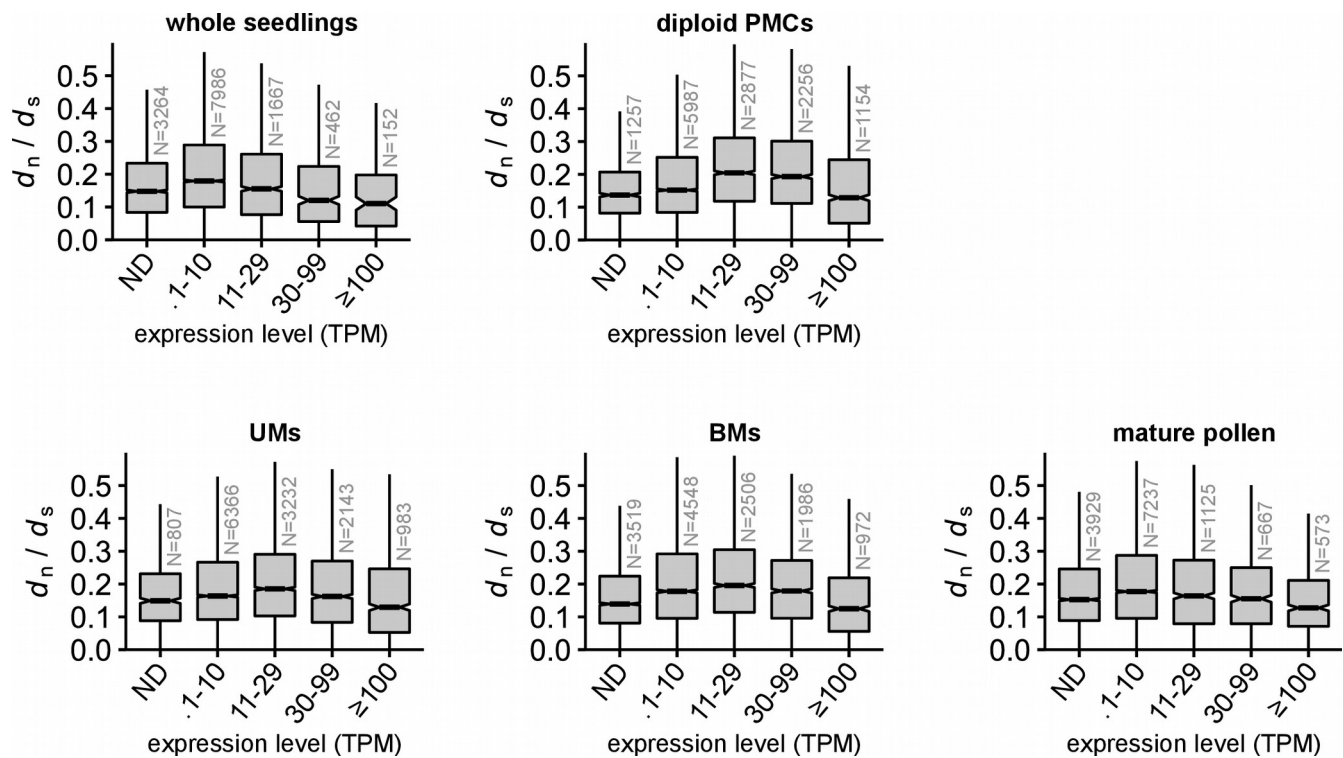

**Figure S7. Substitution rate vs expression level in different tissues.** The ratio of the number of nonsynonymous substitutions per nonsynonymous site ( $d_n$ ) to the number of synonymous substitutions per synonymous site ( $d_s$ ) for genes expressed at different levels in the listed tissues. Diploid tissues are on top and haploid tissues on the bottom. All tissues show a non-monotonic relationship with expression level vs  $d_n/d_s$ . Boxplots show the median (horizontal line), interquartile range (shaded area; IQR), and whiskers extending up to 1.5 x IQR. TPM, transcripts per million; ND, not detected; PMCs, pollen mother cells; UMs, unicellular microspores; BMs, bicellular microspores.

The reasons  $d_n/d_s$  increases with expression level for low-expressed genes are not clear. One hypothesis is that (i) while purifying selection more often reduces  $d_n/d_s$  for genes with higher expression levels, (ii) transcription-coupled DNA damage leads to a higher mutation rate with increasing transcription; these two mechanisms have opposing effects, and for low-expressed genes the effect of DNA damage outweighs purifying selection while for moderate-expressed genes the balance favors purifying selection. An alternative hypothesis is that, because maize went through a recent whole-genome duplication, the low-expressed genes are more often duplicated genes that are experiencing weakened selection during the process of pseudogenization; genes were excluded from the  $d_n/d_s$  calculations if there was not a clear best match between maize and sorghum (the species used to calculate  $d_n/d_s$ ), but perhaps the recent gene duplication still has an effect here.

While the reasons for the non-monotonic relationship between  $d_n/d_s$  and expression level were not clear, this effect was seen in all tissues and complicates the analysis for low-

769 expressed genes. We focused our main-text analysis on moderately-expressed genes  
 770 (>100 TPM), a threshold where all tissues show decreasing  $d_n/d_s$  with expression level.

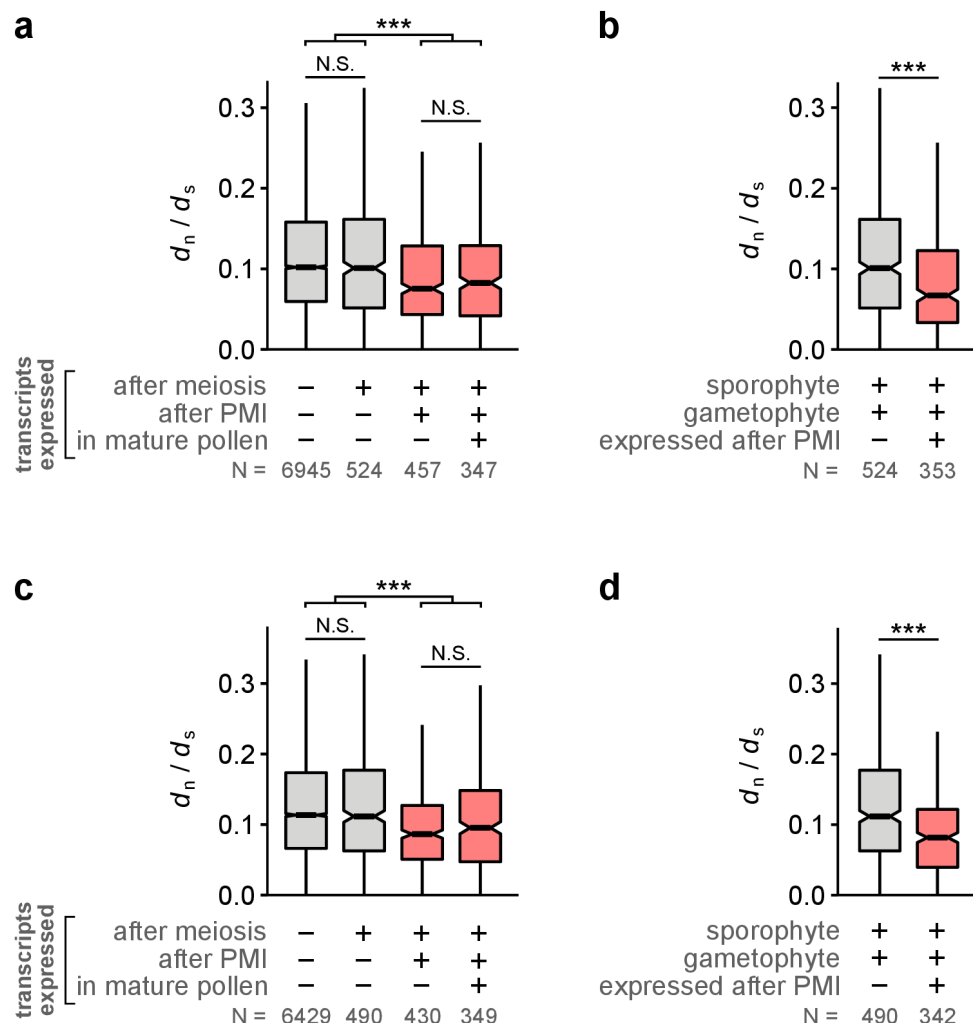

**Figure S8. Conservation of gametophyte-expressed genes, in comparison to rice and *Brachypodium*.** The ratio of the number of nonsynonymous substitutions per nonsynonymous site ( $d_n$ ) to the number of synonymous substitutions per synonymous site ( $d_s$ ) for different gene categories. This figure reproduces the results of Fig. 3a and 3d using different species to calculate  $d_n/d_s$ . In Fig. 3,  $d_n/d_s$  was calculated by comparing maize to sorghum, while in this figure it was calculated by comparing maize to rice (panels **a**, **b**) and maize to *Brachypodium distachyon* (panels **c**, **d**). Boxplots show the median (horizontal line), interquartile range (shaded area; IQR), and whiskers extending up to 1.5 x IQR. Gene categories expressed after PMI are shaded red. \*\*\*,  $p < 0.001$ , Wilcoxon test adjusted for multiple hypothesis testing with Holm's method.

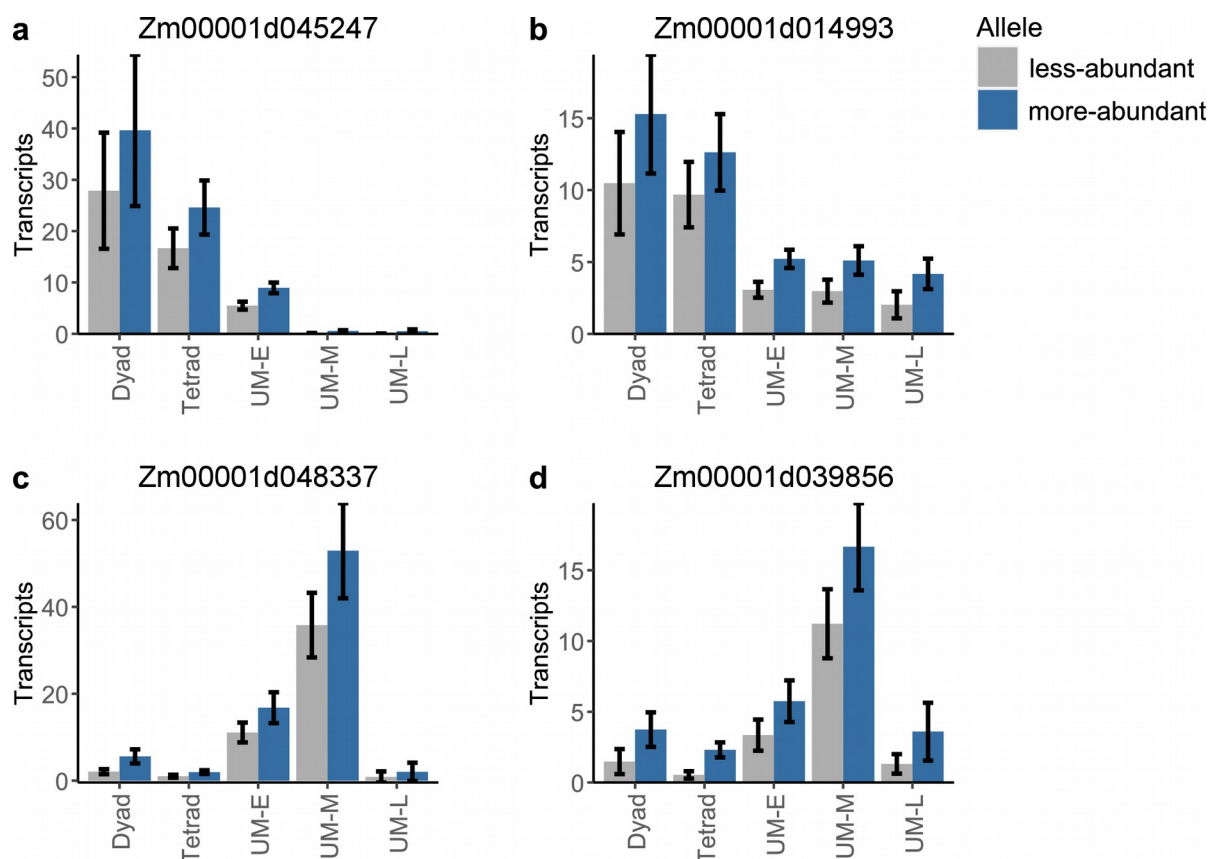

**Figure S9. Expression of selected genes from the dyad through UM stages.** Gray bars show the average number of transcripts detected for the less-abundant allele while blue bars show the more-abundant allele. Shown are example genes that (a) decay in abundance quickly during the UM stage, (b) persist during the UM stage, (c,d) increase in transcript abundance from both alleles during the UM stage. All values are trimmed mean (trim = 0.2)  $\pm$  standard error, calculated by bootstrapping.

789 **Table S1.** Metadata for single pollen precursor samples collected for this study.

790

791 **Table S2.** Differentially expressed genes during pollen development, focusing on  
792 changes in absolute transcript abundance (transcripts per precursor).

793

794 **Table S3.** Differentially expressed genes during pollen development, focusing on  
795 changes in relative transcript abundance (transcripts per million).

796

797 **Table S4.** Sequence of CEL-Seq primers used in this study. The CEL-Seq barcode  
798 sequence is underlined.

**Supplementary Note 1**

On Illumina patterned flow cells (e.g. Illumina HiSeq 4000, Novaseq) a fraction of multiplexed sample indexes can be exchanged during sequencing, producing incorrect sample assignments<sup>47,48</sup>. Our libraries were prepared with two sample barcodes: an Illumina index (contained on the i7 Illumina adapter) and an internal CEL-seq barcode contained within the first read of paired-end sequencing:

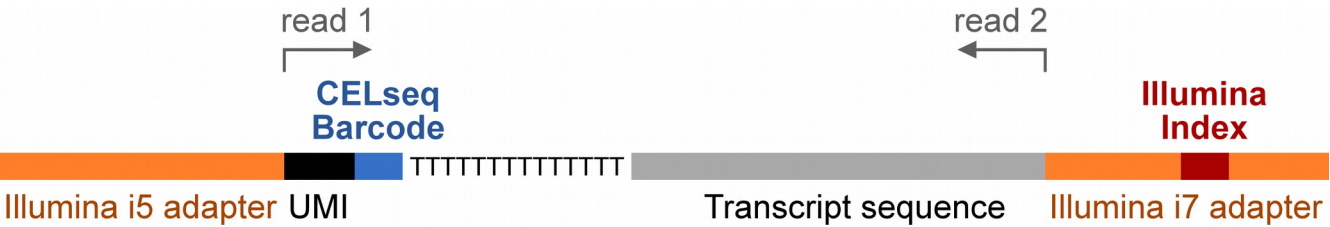

All samples had a unique combination of CELseq barcodes and Illumina indexes, but some samples shared one or the other barcode (for instance, two samples might have the same Illumina index but different CELseq barcodes). To evaluate the index hopping artifact, we compared samples from different stages that either shared or did not share one of the two barcodes. For example, below is a heatmap showing the pairwise Pearson's correlation between a selection of pollen and pachytene (meiosis) samples. In this heatmap, pollen samples were chosen that share either a CELseq barcode or an Illumina index with at least one pachytene sample. Pachytene samples were divided into 3 groups: those that have no indexes in common with any pollen sample, those that share a CELseq barcode with at least one pollen sample, and those that share an Illumina index with at least one pollen sample:

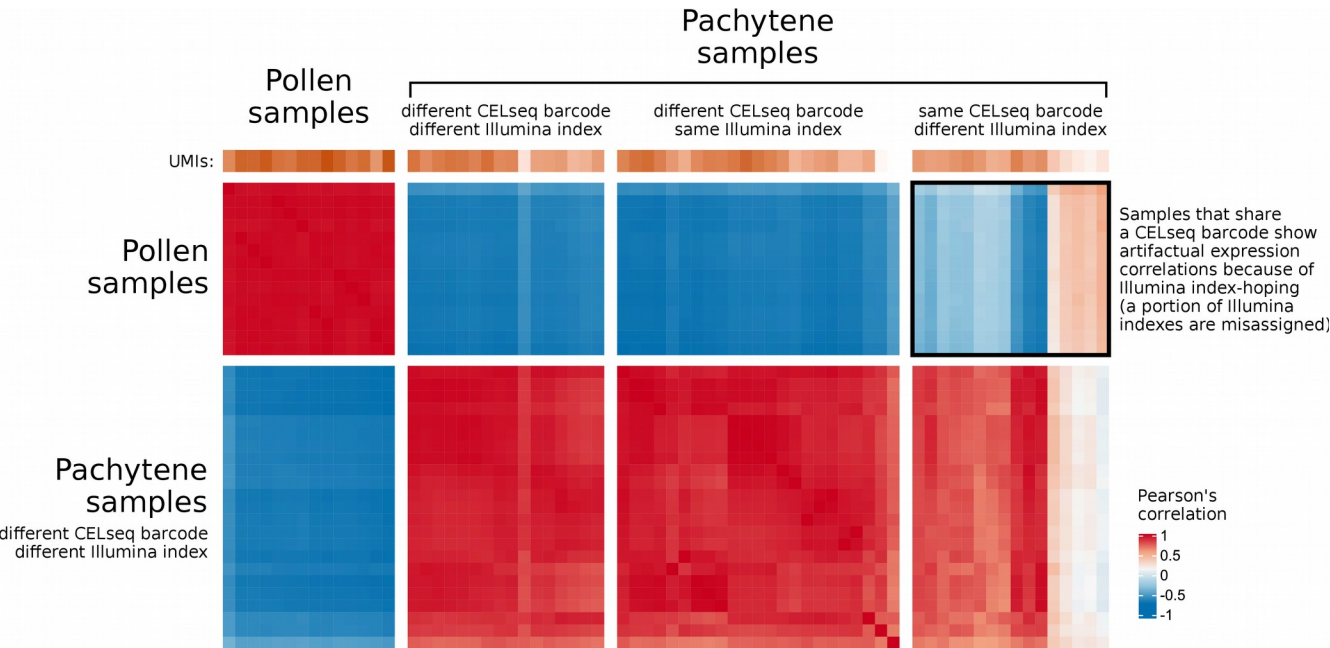



As can be seen above, pachytene and pollen samples that do not share any barcoding information have distinctive transcription profiles and do not correlate with each other (1<sup>st</sup> and 2<sup>nd</sup> groups of samples). Samples that share an Illumina index but have different CELseq barcodes also do not show correlation between samples of different types (3<sup>rd</sup> group of samples); thus, the CELseq barcodes remain reliably associated with the correct transcript. Pachytene and pollen samples that share a CELseq barcode but have different Illumina indexes, however, show correlated expression that is indicative of Illumina index hopping (4<sup>th</sup> group of samples; see boxed region above).

We also observed sequencing reads mapping to impossible barcode combinations (combinations of CEL-seq and Illumina barcodes that were not used in the experiment); on average, 2.9% of reads for a given Illumina index mapped to impossible barcode combinations, consistent with reported index-hopping levels of 0.5%-10%<sup>29,30</sup>. Although this amount of index-hopping has been tolerated in prior single-cell RNA-sequencing experiments<sup>48</sup>, we were concerned that this sequencing artifact could affect our results. We took several steps to mitigate the impact of index-hopping on our data.

833

Data correction and filtering: First, the data were corrected using a published method<sup>48</sup> to discard reads that likely arise from index-hopping. Briefly, reads mapping to the same gene with the same CEL-seq barcode and UMI were unlikely to appear in multiple samples by chance, and instead were probably the result of index-hopping; such reads were discarded unless one sample contributed >80% of all instances with a particular CEL-seq barcode, UMI, and gene combination (which would suggest a sample is the sample-of-origin for the transcript). This step reduced the percentage of reads mapping to impossible barcode combinations from 2.9% down to 0.98%.

Second, samples were excluded if there was evidence of contamination by index-hopping based on either of two criteria: 91 sample were excluded because they contributed fewer than 2.4% of all reads matching a particular CEL-seq barcode. Such samples were at greater risk of index-hopping artifacts; a threshold of 2.4% was chosen because it was sufficient to eliminate all samples with impossible barcode combinations. Next, the data were manually examined for evidence of excess correlations that could arise from index-hopping. Heatmaps were constructed showing the pairwise Pearson's correlation between samples at each pair of developmental stages (similar to the heatmap on the previous page), and samples were removed if they both (i) shared a CEL-seq barcode with samples in the other stage and (ii) showed a greater correlation with the other stage compared to samples that did not have a CEL-seq barcode in common. Neither of these exclusion criteria incorporated information about allele calls, only the total transcript abundance; this was an intentional choice to make sample selection blind to information about biallelic vs monoallelic expression. See Table S1 for a complete list of the excluded samples.

857

Validating conclusions with independent RNA-seq data: To confirm our results, we obtained new data under conditions where index-hopping was eliminated. An additional

192 pollen precursors were collected from the UM through BM stages. RNA-sequencing libraries were then prepared with the 96 CELseq barcodes (Table S4) and only one Illumina index. These libraries were sequenced on two separate HiSeq 4000 lanes (2 lanes x 96 indexes = 192 samples). This strategy avoided using the Illumina indexes for sample identification, thus bypassing the index-hopping artifact (the artifact affects the Illumina indexes but not the internal CELseq barcodes, e.g. see heatmap above). These additional data reproduced all findings from our initial lane of sequencing, and all main text figures include data from both the original and additional sequencing lanes.

868

Conclusions and recommendations on index-hopping: For the current generation of Illumina sequencers that use patterned flow cells, it is important to be aware of index-hopping to avoid artifactual conclusions. Illumina's recommendations are to use Unique Dual Indexes, an approach we are migrating towards.

Single-cell data with extensive multiplexing have the potential to be particularly sensitive to index-hopping artifacts; however, it is reassuring that most single-cell data currently available from plants are likely unaffected: our prior single-cell data<sup>19</sup> was collected using an older HiSeq 2500 instrument, which does not suffer from the index-hopping artifact. The majority of other plant single-cell data have been obtained using the 10X genomics platform. Libraries constructed with 10X are likely free of index-hopping because 10X uses barcodes that are internal to the Illumina adapters (in the same position as the CELseq barcodes used here) and index-hopping specifically affects indexes in the Illumina adapter regions.
